# Supplementary material for: Protein–biomolecule interactions play a major role in shaping corona proteome: studies on milk interacted dietary particles
Source: Royal Society of Chemistry journal article supplement (doi:10.1039/d1nr03712a), 2021-01-01
Supplement: d1nr03712a1.xlsx [file d1nr03712a1.xlsx]

## Sheet: Individual proteins
Particles	Hydrodynamic size	Zetapotential	Hydrophobicity	Protein	MW	PI	Helix	Beta strand	Turn	AAR	No. Arg (R)	No. Lys (K)	No. His (H)	No. Asp (D)	No. Glu (E)	No. Cys (C)	No. Gly (G)	No. Pro (P)	No. Ala (A)	No. Val (V)	No. Ile (I)	No. Leu (L)	No. Met (M)	No. Phe (F)	No. Trp (W)	No. Tyr (Y)	Globular Protein	Fibrillar Protein	Disulfide bond	Phosphorylation site (Y)	Phosphorylation site (T)	Phosphorylation site (S)	O-Glycosylation Site	N-Glycosylation site	Cu binding site	Ca binding site	Zn binding site	Cl binding site
FG-SiO2-NP	583.778	-26.2522	0.0190663	a-casein	26019	4.6	2	1	0	222	6	25	3	4	24	3	2	10	11	15	12	16	5	9	2	12	1	0	0	4	4	9	9	1	0	0	0	0	39.7687
FG-SiO2-MP	3491.92	-19.1167	0.0105373	a-casein	26019	4.6	2	1	0	222	6	25	3	4	24	3	2	10	11	15	12	16	5	9	2	12	1	0	0	4	4	9	9	1	0	0	0	0	4.51915
FG-TiO2-NP	616.497	-35.485	0.015372	a-casein	26019	4.6	2	1	0	222	6	25	3	4	24	3	2	10	11	15	12	16	5	9	2	12	1	0	0	4	4	9	9	1	0	0	0	0	3.79258
E171	252.627	-56.6533	0.0146964	a-casein	26019	4.6	2	1	0	222	6	25	3	4	24	3	2	10	11	15	12	16	5	9	2	12	1	0	0	4	4	9	9	1	0	0	0	0	4.17437
FG-SiO2-NP	583.778	-26.2522	0.0190663	B-casein	25107	4.6	0	0	0	224	4	12	5	4	19	1	5	35	9	21	11	27	7	9	1	4	1	0	0	0	2	8	10	0	0	0	0	0	45.4585
FG-SiO2-MP	3491.92	-19.1167	0.0105373	B-casein	25107	4.6	0	0	0	224	4	12	5	4	19	1	5	35	9	21	11	27	7	9	1	4	1	0	0	0	2	8	10	0	0	0	0	0	17.1012
FG-TiO2-NP	616.497	-35.485	0.015372	B-casein	25107	4.6	0	0	0	224	4	12	5	4	19	1	5	35	9	21	11	27	7	9	1	4	1	0	0	0	2	8	10	0	0	0	0	0	11.6533
E171	252.627	-56.6533	0.0146964	B-casein	25107	4.6	0	0	0	224	4	12	5	4	19	1	5	35	9	21	11	27	7	9	1	4	1	0	0	0	2	8	10	0	0	0	0	0	10.9969
FG-SiO2-NP	583.778	-26.2522	0.0190663	a-lactalbumin	16247	4.5	9	5	2	142	1	12	4	13	7	8	7	2	5	8	9	17	3	6	4	4	1	0	4	2	0	0	0	1	0	1	0	0	7.72609
FG-SiO2-MP	3491.92	-19.1167	0.0105373	a-lactalbumin	16247	4.5	9	5	2	142	1	12	4	13	7	8	7	2	5	8	9	17	3	6	4	4	1	0	4	2	0	0	0	1	0	1	0	0	0.447321
FG-TiO2-NP	616.497	-35.485	0.015372	a-lactalbumin	16247	4.5	9	5	2	142	1	12	4	13	7	8	7	2	5	8	9	17	3	6	4	4	1	0	4	2	0	0	0	1	0	1	0	0	0.35542
E171	252.627	-56.6533	0.0146964	a-lactalbumin	16247	4.5	9	5	2	142	1	12	4	13	7	8	7	2	5	8	9	17	3	6	4	4	1	0	4	2	0	0	0	1	0	1	0	0	0.545826
FG-SiO2-NP	583.778	-26.2522	0.0190663	B-lactoglobulin	19883	5.23	7	14	0	178	3	16	2	10	16	7	5	8	19	9	10	27	5	4	2	4	1	0	3	1	0	0	0	1	0	0	0	0	15.5128
FG-SiO2-MP	3491.92	-19.1167	0.0105373	B-lactoglobulin	19883	5.23	7	14	0	178	3	16	2	10	16	7	5	8	19	9	10	27	5	4	2	4	1	0	3	1	0	0	0	1	0	0	0	0	2.45019
FG-TiO2-NP	616.497	-35.485	0.015372	B-lactoglobulin	19883	5.23	7	14	0	178	3	16	2	10	16	7	5	8	19	9	10	27	5	4	2	4	1	0	3	1	0	0	0	1	0	0	0	0	4.05207
E171	252.627	-56.6533	0.0146964	B-lactoglobulin	19883	5.23	7	14	0	178	3	16	2	10	16	7	5	8	19	9	10	27	5	4	2	4	1	0	3	1	0	0	0	1	0	0	0	0	1.34565
FG-SiO2-NP	583.778	-26.2522	0.0190663	BSA	69293	4.7	34	6	2	607	26	60	17	40	59	35	17	28	48	38	15	65	5	30	3	21	1	0	17	3	6	1	15	1	1	7	3	0	34.1014
FG-SiO2-MP	3491.92	-19.1167	0.0105373	BSA	69293	4.7	34	6	2	607	26	60	17	40	59	35	17	28	48	38	15	65	5	30	3	21	1	0	17	3	6	1	15	1	1	7	3	0	4.93998
FG-TiO2-NP	616.497	-35.485	0.015372	BSA	69293	4.7	34	6	2	607	26	60	17	40	59	35	17	28	48	38	15	65	5	30	3	21	1	0	17	3	6	1	15	1	1	7	3	0	4.18258
E171	252.627	-56.6533	0.0146964	BSA	69293	4.7	34	6	2	607	26	60	17	40	59	35	17	28	48	38	15	65	5	30	3	21	1	0	17	3	6	1	15	1	1	7	3	0	3.43522
FG-SiO2-NP	583.778	-26.2522	0.0190663	HSA	57768	6.47	20	28	12	511	28	24	12	35	20	12	52	22	27	35	28	27	11	19	19	21	1	0	5	4	1	2	5	2	0	4	0	3	4.63841
FG-SiO2-MP	3491.92	-19.1167	0.0105373	HSA	57768	6.47	20	28	12	511	28	24	12	35	20	12	52	22	27	35	28	27	11	19	19	21	1	0	5	4	1	2	5	2	0	4	0	3	0.628092
FG-TiO2-NP	616.497	-35.485	0.015372	HSA	57768	6.47	20	28	12	511	28	24	12	35	20	12	52	22	27	35	28	27	11	19	19	21	1	0	5	4	1	2	5	2	0	4	0	3	2.24331
E171	252.627	-56.6533	0.0146964	HSA	57768	6.47	20	28	12	511	28	24	12	35	20	12	52	22	27	35	28	27	11	19	19	21	1	0	5	4	1	2	5	2	0	4	0	3	2.68301
FG-SiO2-NP	583.778	-26.2522	0.0190663	Trypsin	24409	10	4	16	3	231	4	11	4	10	5	12	25	10	15	16	16	16	2	5	4	8	1	0	6	0	0	1	0	0	0	4	0	0	14.8884
FG-SiO2-MP	3491.92	-19.1167	0.0105373	Trypsin	24409	10	4	16	3	231	4	11	4	10	5	12	25	10	15	16	16	16	2	5	4	8	1	0	6	0	0	1	0	0	0	4	0	0	5.63769
FG-TiO2-NP	616.497	-35.485	0.015372	Trypsin	24409	10	4	16	3	231	4	11	4	10	5	12	25	10	15	16	16	16	2	5	4	8	1	0	6	0	0	1	0	0	0	4	0	0	3.89488
E171	252.627	-56.6533	0.0146964	Trypsin	24409	10	4	16	3	231	4	11	4	10	5	12	25	10	15	16	16	16	2	5	4	8	1	0	6	0	0	1	0	0	0	4	0	0	2.70317
FG-SiO2-NP	583.778	-26.2522	0.0190663	Chymotrypsin	25666	8.52	5	19	3	245	4	14	2	9	5	10	23	9	22	23	10	19	2	6	8	4	1	0	5	1	1	3	2	0	0	0	0	0	37.5865
FG-SiO2-MP	3491.92	-19.1167	0.0105373	Chymotrypsin	25666	8.52	5	19	3	245	4	14	2	9	5	10	23	9	22	23	10	19	2	6	8	4	1	0	5	1	1	3	2	0	0	0	0	0	15.6908
FG-TiO2-NP	616.497	-35.485	0.015372	Chymotrypsin	25666	8.52	5	19	3	245	4	14	2	9	5	10	23	9	22	23	10	19	2	6	8	4	1	0	5	1	1	3	2	0	0	0	0	0	14.6929
E171	252.627	-56.6533	0.0146964	Chymotrypsin	25666	8.52	5	19	3	245	4	14	2	9	5	10	23	9	22	23	10	19	2	6	8	4	1	0	5	1	1	3	2	0	0	0	0	0	16.5228
FG-SiO2-NP	583.778	-26.2522	0.0190663	Lysozyme	16239	11	8	8	5	147	12	6	1	7	2	9	13	3	14	7	7	15	3	4	6	3	1	0	4	2	1	3	0	0	0	0	0	0	42.4987
FG-SiO2-MP	3491.92	-19.1167	0.0105373	Lysozyme	16239	11	8	8	5	147	12	6	1	7	2	9	13	3	14	7	7	15	3	4	6	3	1	0	4	2	1	3	0	0	0	0	0	0	11.4115
FG-TiO2-NP	616.497	-35.485	0.015372	Lysozyme	16239	11	8	8	5	147	12	6	1	7	2	9	13	3	14	7	7	15	3	4	6	3	1	0	4	2	1	3	0	0	0	0	0	0	4.46038
E171	252.627	-56.6533	0.0146964	Lysozyme	16239	11	8	8	5	147	12	6	1	7	2	9	13	3	14	7	7	15	3	4	6	3	1	0	4	2	1	3	0	0	0	0	0	0	7.0012
FG-SiO2-NP	583.778	-26.2522	0.0190663	Protease	58678	4	0	0	0	550	0	0	9	31	0	8	0	0	0	0	0	0	0	0	17	15	0	0	0	0	11	5	20	8	0	0	3	0	5.4006
FG-SiO2-MP	3491.92	-19.1167	0.0105373	Protease	58678	4	0	0	0	550	0	0	9	31	0	8	0	0	0	0	0	0	0	0	17	15	0	0	0	0	11	5	20	8	0	0	3	0	3.53419
FG-TiO2-NP	616.497	-35.485	0.015372	Protease	58678	4	0	0	0	550	0	0	9	31	0	8	0	0	0	0	0	0	0	0	17	15	0	0	0	0	11	5	20	8	0	0	3	0	2.64697
E171	252.627	-56.6533	0.0146964	Protease	58678	4	0	0	0	550	0	0	9	31	0	8	0	0	0	0	0	0	0	0	17	15	0	0	0	0	11	5	20	8	0	0	3	0	2.72236
FG-SiO2-NP	583.778	-26.2522	0.0190663	Pepsin	41262	3.2	16	28	4	385	4	11	3	30	15	7	36	18	20	27	26	39	5	16	6	17	1	0	3	3	0	6	1	0	0	0	0	0	0.613731
FG-SiO2-MP	3491.92	-19.1167	0.0105373	Pepsin	41262	3.2	16	28	4	385	4	11	3	30	15	7	36	18	20	27	26	39	5	16	6	17	1	0	3	3	0	6	1	0	0	0	0	0	0.60276
FG-TiO2-NP	616.497	-35.485	0.015372	Pepsin	41262	3.2	16	28	4	385	4	11	3	30	15	7	36	18	20	27	26	39	5	16	6	17	1	0	3	3	0	6	1	0	0	0	0	0	2.96964
E171	252.627	-56.6533	0.0146964	Pepsin	41262	3.2	16	28	4	385	4	11	3	30	15	7	36	18	20	27	26	39	5	16	6	17	1	0	3	3	0	6	1	0	0	0	0	0	3.67998
FG-SiO2-NP	583.778	-26.2522	0.0190663	Pancretin																																			2.99251
FG-SiO2-MP	3491.92	-19.1167	0.0105373																																				1.15107
FG-TiO2-NP	616.497	-35.485	0.015372																																				1.49594
E171	252.627	-56.6533	0.0146964																																				2.8657

## Sheet: 20 abundant proteins
Particles	Hydrodynamic size	Zetapotential	Hydrophobicity	Protein	MW	PI	Helix	Beta strand	Turn	AAR	No. Arg (R)	No. Lys (K)	No. His (H)	No. Asp (D)	No. Glu (E)	No. Cys (C)	No. Gly (G)	No. Pro (P)	No. Ala (A)	No. Val (V)	No. Ile (I)	No. Leu (L)	No. Met (M)	No. Phe (F)	No. Trp (W)	No. Tyr (Y)	Globular Protein	Fibrillar Protein	Disulfide bond	Phosphorylation site (Y)	Phosphorylation site (T)	Phosphorylation site (S)	O-Glycosylation Site	N-Glycosylation site	Cu binding site	Ca binding site	Fe/S binding site	Fe binding site	Zn binding site	Mg/Mn binding site	percentage	% of Amino acid Identified	No. of peptide
Milk	0	0	0	Beta-lactoglobulin	19883	4.83	7	14	0	178	3	16	2	10	16	7	5	8	19	9	10	27	5	4	2	4	1	0	3	1	0	0	0	1	0	0	0	0	0	0	8.7	87	876
FG-SiO2-nm	583.778	-26.2522	0.0190663	Beta-lactoglobulin	19883	4.83	7	14	0	178	3	16	2	10	16	7	5	8	19	9	10	27	5	4	2	4	1	0	3	1	0	0	0	1	0	0	0	0	0	0	2.3	83	215
FG-SiO2-um	3491.92	-19.1167	0.0105373	Beta-lactoglobulin	19883	4.83	7	14	0	178	3	16	2	10	16	7	5	8	19	9	10	27	5	4	2	4	1	0	3	1	0	0	0	1	0	0	0	0	0	0	2.8	83	239
FG-TiO2-nm	616.497	-35.485	0.015372	Beta-lactoglobulin	19883	4.83	7	14	0	178	3	16	2	10	16	7	5	8	19	9	10	27	5	4	2	4	1	0	3	1	0	0	0	1	0	0	0	0	0	0	2.6	28	292
E171	252.627	-56.6533	0.0146964	Beta-lactoglobulin	19883	4.83	7	14	0	178	3	16	2	10	16	7	5	8	19	9	10	27	5	4	2	4	1	0	3	1	0	0	0	1	0	0	0	0	0	0	2.1	79	212
Milk	0	0	0	Albumin	69293	5.6	33	6	2	607	26	60	17	40	59	35	17	28	48	38	15	65	5	30	3	21	1	0	17	3	6	1	15	0	1	7	0	0	3	0	4.2	8.3	429
FG-SiO2-nm	583.778	-26.2522	0.0190663	Albumin	69293	5.6	33	6	2	607	26	60	17	40	59	35	17	28	48	38	15	65	5	30	3	21	1	0	17	3	6	1	15	0	1	7	0	0	3	0	2.3	77	212
FG-SiO2-um	3491.92	-19.1167	0.0105373	Albumin	69293	5.6	33	6	2	607	26	60	17	40	59	35	17	28	48	38	15	65	5	30	3	21	1	0	17	3	6	1	15	0	1	7	0	0	3	0	3	82	259
FG-TiO2-nm	616.497	-35.485	0.015372	Albumin	69293	5.6	33	6	2	607	26	60	17	40	59	35	17	28	48	38	15	65	5	30	3	21	1	0	17	3	6	1	15	0	1	7	0	0	3	0	0.66	64	73
E171	252.627	-56.6533	0.0146964	Albumin	69293	5.6	33	6	2	607	26	60	17	40	59	35	17	28	48	38	15	65	5	30	3	21	1	0	17	3	6	1	15	0	1	7	0	0	3	0	0.59	56	59
Milk	0	0	0	Alpha-S1-casein	24529	4.91	0	0	0	214	6	15	5	7	25	1	9	17	12	13	12	22	6	8	2	10	1	0	0	0	1	7	1	0	0	0	0	0	0	0	3.7	77	372
FG-SiO2-nm	583.778	-26.2522	0.0190663	Alpha-S1-casein	24529	4.91	0	0	0	214	6	15	5	7	25	1	9	17	12	13	12	22	6	8	2	10	1	0	0	0	1	7	1	0	0	0	0	0	0	0	2.8	77	258
FG-SiO2-um	3491.92	-19.1167	0.0105373	Alpha-S1-casein	24529	4.91	0	0	0	214	6	15	5	7	25	1	9	17	12	13	12	22	6	8	2	10	1	0	0	0	1	7	1	0	0	0	0	0	0	0	3.4	69	294
FG-TiO2-nm	616.497	-35.485	0.015372	Alpha-S1-casein	24529	4.91	0	0	0	214	6	15	5	7	25	1	9	17	12	13	12	22	6	8	2	10	1	0	0	0	1	7	1	0	0	0	0	0	0	0	6.6	69	725
E171	252.627	-56.6533	0.0146964	Alpha-S1-casein	24529	4.91	0	0	0	214	6	15	5	7	25	1	9	17	12	13	12	22	6	8	2	10	1	0	0	0	1	7	1	0	0	0	0	0	0	0	7.4	69	737
Milk	0	0	0	Kappa-casein	21237	5.93	0	0	0	190	5	10	3	4	12	2	3	21	16	13	13	13	4	7	1	9	0	0	3	2	4	3	15	0	0	0	0	0	0	0	3.1	51	317
FG-SiO2-nm	583.778	-26.2522	0.0190663	Kappa-casein	21237	5.93	0	0	0	190	5	10	3	4	12	2	3	21	16	13	13	13	4	7	1	9	0	0	3	2	4	3	15	0	0	0	0	0	0	0	5.1	51	470
FG-SiO2-um	3491.92	-19.1167	0.0105373	Kappa-casein	21237	5.93	0	0	0	190	5	10	3	4	12	2	3	21	16	13	13	13	4	7	1	9	0	0	3	2	4	3	15	0	0	0	0	0	0	0	2.8	51	238
FG-TiO2-nm	616.497	-35.485	0.015372	Kappa-casein	21237	5.93	0	0	0	190	5	10	3	4	12	2	3	21	16	13	13	13	4	7	1	9	0	0	3	2	4	3	15	0	0	0	0	0	0	0	2.9	51	321
E171	252.627	-56.6533	0.0146964	Kappa-casein	21237	5.93	0	0	0	190	5	10	3	4	12	2	3	21	16	13	13	13	4	7	1	9	0	0	3	2	4	3	15	0	0	0	0	0	0	0	2.2	51	222
Milk	0	0	0	Lactotransferrin	78056	8.67	28	32	11	708	37	55	10	36	40	35	51	31	70	47	16	73	5	28	13	21	1	0	16	3	2	5	4	4	0	0	0	8	0	0	2.6	72	259
FG-SiO2-nm	583.778	-26.2522	0.0190663	Lactotransferrin	78056	8.67	28	32	11	708	37	55	10	36	40	35	51	31	70	47	16	73	5	28	13	21	1	0	16	3	2	5	4	4	0	0	0	8	0	0	6.6	81	604
FG-SiO2-um	3491.92	-19.1167	0.0105373	Lactotransferrin	78056	8.67	28	32	11	708	37	55	10	36	40	35	51	31	70	47	16	73	5	28	13	21	1	0	16	3	2	5	4	4	0	0	0	8	0	0	5.5	81	472
FG-TiO2-nm	616.497	-35.485	0.015372	Lactotransferrin	78056	8.67	28	32	11	708	37	55	10	36	40	35	51	31	70	47	16	73	5	28	13	21	1	0	16	3	2	5	4	4	0	0	0	8	0	0	3.1	76	338
E171	252.627	-56.6533	0.0146964	Lactotransferrin	78056	8.67	28	32	11	708	37	55	10	36	40	35	51	31	70	47	16	73	5	28	13	21	1	0	16	3	2	5	4	4	0	0	0	8	0	0	2.9	74	290
Milk	0	0	0	Alpha-lactalbumin	16247	4.8	9	5	2	142	1	12	4	13	8	8	7	2	5	8	9	17	3	6	4	4	1	0	4	2	0	0	0	0	0	1	0	0	0	0	2.3	81	236
FG-SiO2-nm	583.778	-26.2522	0.0190663	Alpha-lactalbumin	16247	4.8	9	5	2	142	1	12	4	13	8	8	7	2	5	8	9	17	3	6	4	4	1	0	4	2	0	0	0	0	0	1	0	0	0	0	0.34	75	31
FG-SiO2-um	3491.92	-19.1167	0.0105373	Alpha-lactalbumin	16247	4.8	9	5	2	142	1	12	4	13	8	8	7	2	5	8	9	17	3	6	4	4	1	0	4	2	0	0	0	0	0	1	0	0	0	0	0.28	75	24
FG-TiO2-nm	616.497	-35.485	0.015372	Alpha-lactalbumin	16247	4.8	9	5	2	142	1	12	4	13	8	8	7	2	5	8	9	17	3	6	4	4	1	0	4	2	0	0	0	0	0	1	0	0	0	0	0.18	42	20
E171	252.627	-56.6533	0.0146964	Alpha-lactalbumin	16247	4.8	9	5	2	142	1	12	4	13	8	8	7	2	5	8	9	17	3	6	4	4	1	0	4	2	0	0	0	0	0	1	0	0	0	0	0.19	42	19
Milk	0	0	0	Polymeric immunoglobulin receptor	82435	6.86	0	0	0	757	38	48	10	41	45	23	62	39	60	71	26	50	5	26	12	24	1	0	10	7	1	13	2	3	0	0	0	0	0	0	2.3	58	229
FG-SiO2-nm	583.778	-26.2522	0.0190663	Polymeric immunoglobulin receptor	82435	6.86	0	0	0	757	38	48	10	41	45	23	62	39	60	71	26	50	5	26	12	24	1	0	10	7	1	13	2	3	0	0	0	0	0	0	3.1	58	281
FG-SiO2-um	3491.92	-19.1167	0.0105373	Polymeric immunoglobulin receptor	82435	6.86	0	0	0	757	38	48	10	41	45	23	62	39	60	71	26	50	5	26	12	24	1	0	10	7	1	13	2	3	0	0	0	0	0	0	2.3	57	195
FG-TiO2-nm	616.497	-35.485	0.015372	Polymeric immunoglobulin receptor	82435	6.86	0	0	0	757	38	48	10	41	45	23	62	39	60	71	26	50	5	26	12	24	1	0	10	7	1	13	2	3	0	0	0	0	0	0	0.96	51	106
E171	252.627	-56.6533	0.0146964	Polymeric immunoglobulin receptor	82435	6.86	0	0	0	757	38	48	10	41	45	23	62	39	60	71	26	50	5	26	12	24	1	0	10	7	1	13	2	3	0	0	0	0	0	0	0.93	49	93
Milk	0	0	0	Complement C3	187253	6.37	35	93	18	1661	81	123	32	102	112	27	98	77	98	142	96	152	32	54	17	62	1	0	13	12	13	18	7	2	0	0	0	0	0	0	1.8	52	183
FG-SiO2-nm	583.778	-26.2522	0.0190663	Complement C3	187253	6.37	35	93	18	1661	81	123	32	102	112	27	98	77	98	142	96	152	32	54	17	62	1	0	13	12	13	18	7	2	0	0	0	0	0	0	1.9	58	178
FG-SiO2-um	3491.92	-19.1167	0.0105373	Complement C3	187253	6.37	35	93	18	1661	81	123	32	102	112	27	98	77	98	142	96	152	32	54	17	62	1	0	13	12	13	18	7	2	0	0	0	0	0	0	1.4	49	118
FG-TiO2-nm	616.497	-35.485	0.015372	Complement C3	187253	6.37	35	93	18	1661	81	123	32	102	112	27	98	77	98	142	96	152	32	54	17	62	1	0	13	12	13	18	7	2	0	0	0	0	0	0	1.1	48	121
E171	252.627	-56.6533	0.0146964	Complement C3	187253	6.37	35	93	18	1661	81	123	32	102	112	27	98	77	98	142	96	152	32	54	17	62	1	0	13	12	13	18	7	2	0	0	0	0	0	0	1.1	41	105
Milk	0	0	0	Xanthine dehydrogenase/oxidase	146790	7.97	51	49	14	1332	61	89	30	57	88	38	106	71	98	89	68	118	30	68	11	34	1	0	1	5	5	6	16	4	0	0	8	0	0	0	1.7	47	176
FG-SiO2-nm	583.778	-26.2522	0.0190663	Xanthine dehydrogenase/oxidase	146790	7.97	51	49	14	1332	61	89	30	57	88	38	106	71	98	89	68	118	30	68	11	34	1	0	1	5	5	6	16	4	0	0	8	0	0	0	1.7	50	159
FG-SiO2-um	3491.92	-19.1167	0.0105373	Xanthine dehydrogenase/oxidase	146790	7.97	51	49	14	1332	61	89	30	57	88	38	106	71	98	89	68	118	30	68	11	34	1	0	1	5	5	6	16	4	0	0	8	0	0	0	1.1	39	93
FG-TiO2-nm	616.497	-35.485	0.015372	Xanthine dehydrogenase/oxidase	146790	7.97	51	49	14	1332	61	89	30	57	88	38	106	71	98	89	68	118	30	68	11	34	1	0	1	5	5	6	16	4	0	0	8	0	0	0	1.7	53	184
E171	252.627	-56.6533	0.0146964	Xanthine dehydrogenase/oxidase	146790	7.97	51	49	14	1332	61	89	30	57	88	38	106	71	98	89	68	118	30	68	11	34	1	0	1	5	5	6	16	4	0	0	8	0	0	0	1.9	54	186
Milk	0	0	0	Alpha-S2-casein	26019	8.34	2	1	0	222	6	25	3	2	24	3	2	10	11	15	12	16	5	9	2	12	0	1	0	4	4	9	9	1	0	0	0	0	0	0	1.4	65	144
FG-SiO2-nm	583.778	-26.2522	0.0190663	Alpha-S2-casein	26019	8.34	2	1	0	222	6	25	3	2	24	3	2	10	11	15	12	16	5	9	2	12	0	1	0	4	4	9	9	1	0	0	0	0	0	0	1.4	65	131
FG-SiO2-um	3491.92	-19.1167	0.0105373	Alpha-S2-casein	26019	8.34	2	1	0	222	6	25	3	2	24	3	2	10	11	15	12	16	5	9	2	12	0	1	0	4	4	9	9	1	0	0	0	0	0	0	1.8	70	157
FG-TiO2-nm	616.497	-35.485	0.015372	Alpha-S2-casein	26019	8.34	2	1	0	222	6	25	3	2	24	3	2	10	11	15	12	16	5	9	2	12	0	1	0	4	4	9	9	1	0	0	0	0	0	0	2.2	70	248
E171	252.627	-56.6533	0.0146964	Alpha-S2-casein	26019	8.34	2	1	0	222	6	25	3	2	24	3	2	10	11	15	12	16	5	9	2	12	0	1	0	4	4	9	9	1	0	0	0	0	0	0	1.9	70	187
Milk	0	0	0	Serotransferrin	77753	6.5	0	0	0	704	25	64	16	47	44	38	94	29	60	43	20	56	11	29	8	23	0	0	18	4	2	5	3	0	0	0	8	0	0	0	1.3	70	132
FG-SiO2-nm	583.778	-26.2522	0.0190663	Serotransferrin	77753	6.5	0	0	0	704	25	64	16	47	44	38	94	29	60	43	20	56	11	29	8	23	0	0	18	4	2	5	3	0	0	0	8	0	0	0	1.1	63	103
FG-SiO2-um	3491.92	-19.1167	0.0105373	Serotransferrin	77753	6.5	0	0	0	704	25	64	16	47	44	38	94	29	60	43	20	56	11	29	8	23	0	0	18	4	2	5	3	0	0	0	8	0	0	0	1.2	69	112
FG-TiO2-nm	616.497	-35.485	0.015372	Serotransferrin	77753	6.5	0	0	0	704	25	64	16	47	44	38	94	29	60	43	20	56	11	29	8	23	0	0	18	4	2	5	3	0	0	0	8	0	0	0	0.29	36	35
E171	252.627	-56.6533	0.0146964	Serotransferrin	77753	6.5	0	0	0	704	25	64	16	47	44	38	94	29	60	43	20	56	11	29	8	23	0	0	18	4	2	5	3	0	0	0	8	0	0	0	0.2	24	24
Milk	0	0	0	Lactadherin	47411	6.63	4	9	0	427	20	16	11	20	17	20	39	21	29	20	23	36	7	22	10	15	0	0	9	2	4	1	8	3	0	0	0	0	0	0	0.89	57	90
FG-SiO2-nm	583.778	-26.2522	0.0190663	Lactadherin	47411	6.63	4	9	0	427	20	16	11	20	17	20	39	21	29	20	23	36	7	22	10	15	0	0	9	2	4	1	8	3	0	0	0	0	0	0	0.96	58	88
FG-SiO2-um	3491.92	-19.1167	0.0105373	Lactadherin	47411	6.63	4	9	0	427	20	16	11	20	17	20	39	21	29	20	23	36	7	22	10	15	0	0	9	2	4	1	8	3	0	0	0	0	0	0	0.63	53	54
FG-TiO2-nm	616.497	-35.485	0.015372	Lactadherin	47411	6.63	4	9	0	427	20	16	11	20	17	20	39	21	29	20	23	36	7	22	10	15	0	0	9	2	4	1	8	3	0	0	0	0	0	0	0.68	58	75
E171	252.627	-56.6533	0.0146964	Lactadherin	47411	6.63	4	9	0	427	20	16	11	20	17	20	39	21	29	20	23	36	7	22	10	15	0	0	9	2	4	1	8	3	0	0	0	0	0	0	0.65	57	65
Milk	0	0	0	Butyrophilin subfamily 1 member A1	59277	5.11	4	15	2	526	33	24	10	27	50	12	36	38	30	44	24	48	13	26	12	12	0	0	2	3	5	14	0	3	0	0	0	0	0	0	0.78	54	79
FG-SiO2-nm	583.778	-26.2522	0.0190663	Butyrophilin subfamily 1 member A1	59277	5.11	4	15	2	526	33	24	10	27	50	12	36	38	30	44	24	48	13	26	12	12	0	0	2	3	5	14	0	3	0	0	0	0	0	0	0.62	52	57
FG-SiO2-um	3491.92	-19.1167	0.0105373	Butyrophilin subfamily 1 member A1	59277	5.11	4	15	2	526	33	24	10	27	50	12	36	38	30	44	24	48	13	26	12	12	0	0	2	3	5	14	0	3	0	0	0	0	0	0	0.57	51	49
FG-TiO2-nm	616.497	-35.485	0.015372	Butyrophilin subfamily 1 member A1	59277	5.11	4	15	2	526	33	24	10	27	50	12	36	38	30	44	24	48	13	26	12	12	0	0	2	3	5	14	0	3	0	0	0	0	0	0	1.3	60	146
E171	252.627	-56.6533	0.0146964	Butyrophilin subfamily 1 member A1	59277	5.11	4	15	2	526	33	24	10	27	50	12	36	38	30	44	24	48	13	26	12	12	0	0	2	3	5	14	0	3	0	0	0	0	0	0	1.4	58	135
Milk	0	0	0	Beta-casein	25000	5.13	0	0	0	224	4	12	5	4	19	1	5	35	9	21	11	27	7	9	1	4	1	0	0	0	2	8	10	0	0	0	0	0	0	0	0.61	25	62
FG-SiO2-nm	583.778	-26.2522	0.0190663	Beta-casein	25000	5.13	0	0	0	224	4	12	5	4	19	1	5	35	9	21	11	27	7	9	1	4	1	0	0	0	2	8	10	0	0	0	0	0	0	0	1.6	26	149
FG-SiO2-um	3491.92	-19.1167	0.0105373	Beta-casein	25000	5.13	0	0	0	224	4	12	5	4	19	1	5	35	9	21	11	27	7	9	1	4	1	0	0	0	2	8	10	0	0	0	0	0	0	0	1	25	87
FG-TiO2-nm	616.497	-35.485	0.015372	Beta-casein	25000	5.13	0	0	0	224	4	12	5	4	19	1	5	35	9	21	11	27	7	9	1	4	1	0	0	0	2	8	10	0	0	0	0	0	0	0	1.2	25	136
E171	252.627	-56.6533	0.0146964	Beta-casein	25000	5.13	0	0	0	224	4	12	5	4	19	1	5	35	9	21	11	27	7	9	1	4	1	0	0	0	2	8	10	0	0	0	0	0	0	0	1.2	25	121
Milk	0	0	0	Lactoperoxidase	81000	8.27	27	31	7	712	46	40	15	38	37	16	42	44	49	37	31	79	12	35	16	16	1	0	6	4	3	3	22	5	0	5	0	0	0	0	0.6	49	61
FG-SiO2-nm	583.778	-26.2522	0.0190663	Lactoperoxidase	81000	8.27	27	31	7	712	46	40	15	38	37	16	42	44	49	37	31	79	12	35	16	16	1	0	6	4	3	3	22	5	0	5	0	0	0	0	1.6	61	146
FG-SiO2-um	3491.92	-19.1167	0.0105373	Lactoperoxidase	81000	8.27	27	31	7	712	46	40	15	38	37	16	42	44	49	37	31	79	12	35	16	16	1	0	6	4	3	3	22	5	0	5	0	0	0	0	1.4	59	120
FG-TiO2-nm	616.497	-35.485	0.015372	Lactoperoxidase	81000	8.27	27	31	7	712	46	40	15	38	37	16	42	44	49	37	31	79	12	35	16	16	1	0	6	4	3	3	22	5	0	5	0	0	0	0	0.89	50	98
E171	252.627	-56.6533	0.0146964	Lactoperoxidase	81000	8.27	27	31	7	712	46	40	15	38	37	16	42	44	49	37	31	79	12	35	16	16	1	0	6	4	3	3	22	5	0	5	0	0	0	0	0.77	49	77
Milk	0	0	0	Glycosylation-dependent cell adhesion molecule 1	17152	5.98	0	0	0	153	6	13	5	5	16	1	3	7	10	5	10	21	3	4	0	1	0	0	0	0	3	3	15	1	0	0	0	0	0	0	0.55	42	56
FG-SiO2-nm	583.778	-26.2522	0.0190663	Glycosylation-dependent cell adhesion molecule 1	17152	5.98	0	0	0	153	6	13	5	5	16	1	3	7	10	5	10	21	3	4	0	1	0	0	0	0	3	3	15	1	0	0	0	0	0	0	0.22	31	20
FG-SiO2-um	3491.92	-19.1167	0.0105373	Glycosylation-dependent cell adhesion molecule 1	17152	5.98	0	0	0	153	6	13	5	5	16	1	3	7	10	5	10	21	3	4	0	1	0	0	0	0	3	3	15	1	0	0	0	0	0	0	0.41	53	35
FG-TiO2-nm	616.497	-35.485	0.015372	Glycosylation-dependent cell adhesion molecule 1	17152	5.98	0	0	0	153	6	13	5	5	16	1	3	7	10	5	10	21	3	4	0	1	0	0	0	0	3	3	15	1	0	0	0	0	0	0	0.17	26	19
E171	252.627	-56.6533	0.0146964	Glycosylation-dependent cell adhesion molecule 1	17152	5.98	0	0	0	153	6	13	5	5	16	1	3	7	10	5	10	21	3	4	0	1	0	0	0	0	3	3	15	1	0	0	0	0	0	0	0.23	40	23
Milk	0	0	0	Zinc-alpha-2-glycoprotein	33852	5.11	0	0	0	299	19	10	8	16	26	4	22	22	27	17	5	26	5	12	8	16	0	0	2	2	1	2	4	3	0	0	0	0	0	0	0.54	52	55
FG-SiO2-nm	583.778	-26.2522	0.0190663	Zinc-alpha-2-glycoprotein	33852	5.11	0	0	0	299	19	10	8	16	26	4	22	22	27	17	5	26	5	12	8	16	0	0	2	2	1	2	4	3	0	0	0	0	0	0	0.076	28	7
FG-SiO2-um	3491.92	-19.1167	0.0105373	Zinc-alpha-2-glycoprotein	33852	5.11	0	0	0	299	19	10	8	16	26	4	22	22	27	17	5	26	5	12	8	16	0	0	2	2	1	2	4	3	0	0	0	0	0	0	0.093	33	8
FG-TiO2-nm	616.497	-35.485	0.015372	Zinc-alpha-2-glycoprotein	33852	5.11	0	0	0	299	19	10	8	16	26	4	22	22	27	17	5	26	5	12	8	16	0	0	2	2	1	2	4	3	0	0	0	0	0	0	0	0	0
E171	252.627	-56.6533	0.0146964	Zinc-alpha-2-glycoprotein	33852	5.11	0	0	0	299	19	10	8	16	26	4	22	22	27	17	5	26	5	12	8	16	0	0	2	2	1	2	4	3	0	0	0	0	0	0	0	0	0
Milk	0	0	0	Nucleobindin-1	54982	5.05	0	0	0	474	36	29	18	30	65	0	19	30	35	23	6	59	11	14	2	8	1	0	0	2	1	3	15	0	0	2	0	0	0	0	0.53	52	54
FG-SiO2-nm	583.778	-26.2522	0.0190663	Nucleobindin-1	54982	5.05	0	0	0	474	36	29	18	30	65	0	19	30	35	23	6	59	11	14	2	8	1	0	0	2	1	3	15	0	0	2	0	0	0	0	0.18	35	17
FG-SiO2-um	3491.92	-19.1167	0.0105373	Nucleobindin-1	54982	5.05	0	0	0	474	36	29	18	30	65	0	19	30	35	23	6	59	11	14	2	8	1	0	0	2	1	3	15	0	0	2	0	0	0	0	0.68	53	59
FG-TiO2-nm	616.497	-35.485	0.015372	Nucleobindin-1	54982	5.05	0	0	0	474	36	29	18	30	65	0	19	30	35	23	6	59	11	14	2	8	1	0	0	2	1	3	15	0	0	2	0	0	0	0	0.063	21	7
E171	252.627	-56.6533	0.0146964	Nucleobindin-1	54982	5.05	0	0	0	474	36	29	18	30	65	0	19	30	35	23	6	59	11	14	2	8	1	0	0	2	1	3	15	0	0	2	0	0	0	0	0.03	7.8	3
Milk	0	0	0	Perilipin-2	49368	8.73	0	0	0	450	21	32	7	22	26	5	23	19	38	39	17	43	11	5	4	14	0	0	0	2	2	7	16	3	0	0	0	0	0	0	0.52	61	53
FG-SiO2-nm	583.778	-26.2522	0.0190663	Perilipin-2	49368	8.73	0	0	0	450	21	32	7	22	26	5	23	19	38	39	17	43	11	5	4	14	0	0	0	2	2	7	16	3	0	0	0	0	0	0	0.54	55	50
FG-SiO2-um	3491.92	-19.1167	0.0105373	Perilipin-2	49368	8.73	0	0	0	450	21	32	7	22	26	5	23	19	38	39	17	43	11	5	4	14	0	0	0	2	2	7	16	3	0	0	0	0	0	0	0.64	55	55
FG-TiO2-nm	616.497	-35.485	0.015372	Perilipin-2	49368	8.73	0	0	0	450	21	32	7	22	26	5	23	19	38	39	17	43	11	5	4	14	0	0	0	2	2	7	16	3	0	0	0	0	0	0	0.84	69	93
E171	252.627	-56.6533	0.0146964	Perilipin-2	49368	8.73	0	0	0	450	21	32	7	22	26	5	23	19	38	39	17	43	11	5	4	14	0	0	0	2	2	7	16	3	0	0	0	0	0	0	0.69	63	69
Milk	0	0	0	Lipoprotein lipase	53378	8.72	0	0	0	478	22	35	14	22	27	11	36	20	29	36	23	41	9	21	8	19	1	0	5	3	2	2	3	3	0	4	0	0	0	0	0.38	26	38
FG-SiO2-nm	583.778	-26.2522	0.0190663	Lipoprotein lipase	53378	8.72	0	0	0	478	22	35	14	22	27	11	36	20	29	36	23	41	9	21	8	19	1	0	5	3	2	2	3	3	0	4	0	0	0	0	0.52	30	48
FG-SiO2-um	3491.92	-19.1167	0.0105373	Lipoprotein lipase	53378	8.72	0	0	0	478	22	35	14	22	27	11	36	20	29	36	23	41	9	21	8	19	1	0	5	3	2	2	3	3	0	4	0	0	0	0	0.51	29	44
FG-TiO2-nm	616.497	-35.485	0.015372	Lipoprotein lipase	53378	8.72	0	0	0	478	22	35	14	22	27	11	36	20	29	36	23	41	9	21	8	19	1	0	5	3	2	2	3	3	0	4	0	0	0	0	0.31	29	34
E171	252.627	-56.6533	0.0146964	Lipoprotein lipase	53378	8.72	0	0	0	478	22	35	14	22	27	11	36	20	29	36	23	41	9	21	8	19	1	0	5	3	2	2	3	3	0	4	0	0	0	0	0.24	29	24
Milk	0	0	0	Complement factor H	140374	6.33	0	0	0	1236	68	81	31	58	100	82	95	91	47	72	66	55	17	34	26	62	1	0	40	14	9	12	34	2	0	0	0	0	0	0	0	0	0
FG-SiO2-nm	583.778	-26.2522	0.0190663	Complement factor H	140374	6.33	0	0	0	1236	68	81	31	58	100	82	95	91	47	72	66	55	17	34	26	62	1	0	40	14	9	12	34	2	0	0	0	0	0	0	0.74	41	68
FG-SiO2-um	3491.92	-19.1167	0.0105373	Complement factor H	140374	6.33	0	0	0	1236	68	81	31	58	100	82	95	91	47	72	66	55	17	34	26	62	1	0	40	14	9	12	34	2	0	0	0	0	0	0	0.47	35	41
FG-TiO2-nm	616.497	-35.485	0.015372	Complement factor H	140374	6.33	0	0	0	1236	68	81	31	58	100	82	95	91	47	72	66	55	17	34	26	62	1	0	40	14	9	12	34	2	0	0	0	0	0	0	0.027	3.2	3
E171	252.627	-56.6533	0.0146964	Complement factor H	140374	6.33	0	0	0	1236	68	81	31	58	100	82	95	91	47	72	66	55	17	34	26	62	1	0	40	14	9	12	34	2	0	0	0	0	0	0	0.04	4	4
Milk	0	0	0	C4b-binding protein alpha chain	68886	5.66	0	0	0	610	24	39	15	24	48	37	40	44	18	40	35	44	5	21	12	30	0	0	18	4	2	6	23	4	0	0	0	0	0	0	0.059	12	6
FG-SiO2-nm	583.778	-26.2522	0.0190663	C4b-binding protein alpha chain	68886	5.66	0	0	0	610	24	39	15	24	48	37	40	44	18	40	35	44	5	21	12	30	0	0	18	4	2	6	23	4	0	0	0	0	0	0	0.52	38	48
FG-SiO2-um	3491.92	-19.1167	0.0105373	C4b-binding protein alpha chain	68886	5.66	0	0	0	610	24	39	15	24	48	37	40	44	18	40	35	44	5	21	12	30	0	0	18	4	2	6	23	4	0	0	0	0	0	0	0.24	39	21
FG-TiO2-nm	616.497	-35.485	0.015372	C4b-binding protein alpha chain	68886	5.66	0	0	0	610	24	39	15	24	48	37	40	44	18	40	35	44	5	21	12	30	0	0	18	4	2	6	23	4	0	0	0	0	0	0	0	0	0
E171	252.627	-56.6533	0.0146964	C4b-binding protein alpha chain	68886	5.66	0	0	0	610	24	39	15	24	48	37	40	44	18	40	35	44	5	21	12	30	0	0	18	4	2	6	23	4	0	0	0	0	0	0	0	0	0
Milk	0	0	0	Fibronectin	272154	5.28	0	0	0	2478	128	79	48	121	149	62	207	192	106	201	124	143	26	51	40	101	0	1	30	20	25	39	85	10	0	0	0	0	0	0	0.099	6.5	10
FG-SiO2-nm	583.778	-26.2522	0.0190663	Fibronectin	272154	5.28	0	0	0	2478	128	79	48	121	149	62	207	192	106	201	124	143	26	51	40	101	0	1	30	20	25	39	85	10	0	0	0	0	0	0	0.43	20	40
FG-SiO2-um	3491.92	-19.1167	0.0105373	Fibronectin	272154	5.28	0	0	0	2478	128	79	48	121	149	62	207	192	106	201	124	143	26	51	40	101	0	1	30	20	25	39	85	10	0	0	0	0	0	0	0.15	8.8	13
FG-TiO2-nm	616.497	-35.485	0.015372	Fibronectin	272154	5.28	0	0	0	2478	128	79	48	121	149	62	207	192	106	201	124	143	26	51	40	101	0	1	30	20	25	39	85	10	0	0	0	0	0	0	0	0	0
E171	252.627	-56.6533	0.0146964	Fibronectin	272154	5.28	0	0	0	2478	128	79	48	121	149	62	207	192	106	201	124	143	26	51	40	101	0	1	30	20	25	39	85	10	0	0	0	0	0	0	0	0	0
Milk	0	0	0	Fibrinogen beta chain	53340	8.66	1	1	1	468	28	38	7	31	30	11	41	26	18	27	19	26	13	8	13	23	0	1	8	0	2	2	11	1	0	0	0	0	0	0	0.079	18	8
FG-SiO2-nm	583.778	-26.2522	0.0190663	Fibrinogen beta chain	53340	8.66	1	1	1	468	28	38	7	31	30	11	41	26	18	27	19	26	13	8	13	23	0	1	8	0	2	2	11	1	0	0	0	0	0	0	0.42	53	39
FG-SiO2-um	3491.92	-19.1167	0.0105373	Fibrinogen beta chain	53340	8.66	1	1	1	468	28	38	7	31	30	11	41	26	18	27	19	26	13	8	13	23	0	1	8	0	2	2	11	1	0	0	0	0	0	0	0.25	35	22
FG-TiO2-nm	616.497	-35.485	0.015372	Fibrinogen beta chain	53340	8.66	1	1	1	468	28	38	7	31	30	11	41	26	18	27	19	26	13	8	13	23	0	1	8	0	2	2	11	1	0	0	0	0	0	0	0.09	28	10
E171	252.627	-56.6533	0.0146964	Fibrinogen beta chain	53340	8.66	1	1	1	468	28	38	7	31	30	11	41	26	18	27	19	26	13	8	13	23	0	1	8	0	2	2	11	1	0	0	0	0	0	0	0.11	24	11
Milk	0	0	0	Angiogenin-1	16970	9.1	3	8	3	148	13	9	6	10	6	6	11	10	5	8	10	11	4	7	0	6	0	0	3	0	1	2	2	0	0	0	0	0	0	0	0.14	47	14
FG-SiO2-nm	583.778	-26.2522	0.0190663	Angiogenin-1	16970	9.1	3	8	3	148	13	9	6	10	6	6	11	10	5	8	10	11	4	7	0	6	0	0	3	0	1	2	2	0	0	0	0	0	0	0	0.4	55	37
FG-SiO2-um	3491.92	-19.1167	0.0105373	Angiogenin-1	16970	9.1	3	8	3	148	13	9	6	10	6	6	11	10	5	8	10	11	4	7	0	6	0	0	3	0	1	2	2	0	0	0	0	0	0	0	0.57	62	49
FG-TiO2-nm	616.497	-35.485	0.015372	Angiogenin-1	16970	9.1	3	8	3	148	13	9	6	10	6	6	11	10	5	8	10	11	4	7	0	6	0	0	3	0	1	2	2	0	0	0	0	0	0	0	0.18	50	20
E171	252.627	-56.6533	0.0146964	Angiogenin-1	16970	9.1	3	8	3	148	13	9	6	10	6	6	11	10	5	8	10	11	4	7	0	6	0	0	3	0	1	2	2	0	0	0	0	0	0	0	0.13	39	13
Milk	0	0	0	Plasminogen	91216	7.39	0	0	0	812	44	52	20	35	58	48	58	75	39	44	24	47	14	20	19	33	0	0	24	7	9	9	37	0	0	0	0	0	0	0	0.04	9.2	4
FG-SiO2-nm	583.778	-26.2522	0.0190663	Plasminogen	91216	7.39	0	0	0	812	44	52	20	35	58	48	58	75	39	44	24	47	14	20	19	33	0	0	24	7	9	9	37	0	0	0	0	0	0	0	0.39	36	36
FG-SiO2-um	3491.92	-19.1167	0.0105373	Plasminogen	91216	7.39	0	0	0	812	44	52	20	35	58	48	58	75	39	44	24	47	14	20	19	33	0	0	24	7	9	9	37	0	0	0	0	0	0	0	0.54	35	47
FG-TiO2-nm	616.497	-35.485	0.015372	Plasminogen	91216	7.39	0	0	0	812	44	52	20	35	58	48	58	75	39	44	24	47	14	20	19	33	0	0	24	7	9	9	37	0	0	0	0	0	0	0	0.23	28	25
E171	252.627	-56.6533	0.0146964	Plasminogen	91216	7.39	0	0	0	812	44	52	20	35	58	48	58	75	39	44	24	47	14	20	19	33	0	0	24	7	9	9	37	0	0	0	0	0	0	0	0.13	18	13
Milk	0	0	0	Beta-2-microglobulin	13677	7.96	0	10	1	118	6	9	4	8	6	6	5	9	4	7	6	15	1	5	2	6	1	0	1	2	1	2	1	0	0	0	0	0	0	0	0.31	58	31
FG-SiO2-nm	583.778	-26.2522	0.0190663	Beta-2-microglobulin	13677	7.96	0	10	1	118	6	9	4	8	6	6	5	9	4	7	6	15	1	5	2	6	1	0	1	2	1	2	1	0	0	0	0	0	0	0	0.22	56	20
FG-SiO2-um	3491.92	-19.1167	0.0105373	Beta-2-microglobulin	13677	7.96	0	10	1	118	6	9	4	8	6	6	5	9	4	7	6	15	1	5	2	6	1	0	1	2	1	2	1	0	0	0	0	0	0	0	0.53	64	46
FG-TiO2-nm	616.497	-35.485	0.015372	Beta-2-microglobulin	13677	7.96	0	10	1	118	6	9	4	8	6	6	5	9	4	7	6	15	1	5	2	6	1	0	1	2	1	2	1	0	0	0	0	0	0	0	0.12	33	13
E171	252.627	-56.6533	0.0146964	Beta-2-microglobulin	13677	7.96	0	10	1	118	6	9	4	8	6	6	5	9	4	7	6	15	1	5	2	6	1	0	1	2	1	2	1	0	0	0	0	0	0	0	0.1	33	10
Milk	0	0	0	Broad substrate specificity ATP-binding cassette transporter ABCG2	72725	8.87	0	0	0	655	24	41	8	24	31	12	45	26	42	41	47	82	19	41	5	22	1	1	2	2	2	4	15	4	0	0	0	0	0	0	0.25	28	25
FG-SiO2-nm	583.778	-26.2522	0.0190663	Broad substrate specificity ATP-binding cassette transporter ABCG2	72725	8.87	0	0	0	655	24	41	8	24	31	12	45	26	42	41	47	82	19	41	5	22	1	1	2	2	2	4	15	4	0	0	0	0	0	0	0.065	12	6
FG-SiO2-um	3491.92	-19.1167	0.0105373	Broad substrate specificity ATP-binding cassette transporter ABCG2	72725	8.87	0	0	0	655	24	41	8	24	31	12	45	26	42	41	47	82	19	41	5	22	1	1	2	2	2	4	15	4	0	0	0	0	0	0	0.07	7.6	6
FG-TiO2-nm	616.497	-35.485	0.015372	Broad substrate specificity ATP-binding cassette transporter ABCG2	72725	8.87	0	0	0	655	24	41	8	24	31	12	45	26	42	41	47	82	19	41	5	22	1	1	2	2	2	4	15	4	0	0	0	0	0	0	0.36	33	40
E171	252.627	-56.6533	0.0146964	Broad substrate specificity ATP-binding cassette transporter ABCG2	72725	8.87	0	0	0	655	24	41	8	24	31	12	45	26	42	41	47	82	19	41	5	22	1	1	2	2	2	4	15	4	0	0	0	0	0	0	0.28	29	28
Milk	0	0	0	Fatty acid synthase	274554	6.23	0	0	0	2513	127	90	68	104	140	50	204	142	210	171	109	310	56	88	31	55	0	0	0	6	5	27	43	14	0	0	0	0	0	0	0.18	11	18
FG-SiO2-nm	583.778	-26.2522	0.0190663	Fatty acid synthase	274554	6.23	0	0	0	2513	127	90	68	104	140	50	204	142	210	171	109	310	56	88	31	55	0	0	0	6	5	27	43	14	0	0	0	0	0	0	0.35	18	32
FG-SiO2-um	3491.92	-19.1167	0.0105373	Fatty acid synthase	274554	6.23	0	0	0	2513	127	90	68	104	140	50	204	142	210	171	109	310	56	88	31	55	0	0	0	6	5	27	43	14	0	0	0	0	0	0	0.12	6.6	10
FG-TiO2-nm	616.497	-35.485	0.015372	Fatty acid synthase	274554	6.23	0	0	0	2513	127	90	68	104	140	50	204	142	210	171	109	310	56	88	31	55	0	0	0	6	5	27	43	14	0	0	0	0	0	0	0.35	17	39
E171	252.627	-56.6533	0.0146964	Fatty acid synthase	274554	6.23	0	0	0	2513	127	90	68	104	140	50	204	142	210	171	109	310	56	88	31	55	0	0	0	6	5	27	43	14	0	0	0	0	0	0	0.5	19	50
Milk	0	0	0	Isocitrate dehydrogenase [NADP] cytoplasmic	46785	6.12	0	0	0	414	15	35	8	25	29	6	31	13	30	25	29	29	14	17	7	18	0	0	0	4	1	3	0	2	0	0	0	0	0	3	0.21	39	21
FG-SiO2-nm	583.778	-26.2522	0.0190663	Isocitrate dehydrogenase [NADP] cytoplasmic	46785	6.12	0	0	0	414	15	35	8	25	29	6	31	13	30	25	29	29	14	17	7	18	0	0	0	4	1	3	0	2	0	0	0	0	0	3	0.3	37	28
FG-SiO2-um	3491.92	-19.1167	0.0105373	Isocitrate dehydrogenase [NADP] cytoplasmic	46785	6.12	0	0	0	414	15	35	8	25	29	6	31	13	30	25	29	29	14	17	7	18	0	0	0	4	1	3	0	2	0	0	0	0	0	3	0.31	41	27
FG-TiO2-nm	616.497	-35.485	0.015372	Isocitrate dehydrogenase [NADP] cytoplasmic	46785	6.12	0	0	0	414	15	35	8	25	29	6	31	13	30	25	29	29	14	17	7	18	0	0	0	4	1	3	0	2	0	0	0	0	0	3	0.34	50	38
E171	252.627	-56.6533	0.0146964	Isocitrate dehydrogenase [NADP] cytoplasmic	46785	6.12	0	0	0	414	15	35	8	25	29	6	31	13	30	25	29	29	14	17	7	18	0	0	0	4	1	3	0	2	0	0	0	0	0	3	0.3	47	30
Milk	0	0	0	Heat shock cognate 71 kDa protein	71241	5.37	20	30	7	650	28	54	7	46	49	4	55	27	50	46	44	44	14	24	2	15	0	0	0	3	8	7	6	7	0	0	0	0	0	0	0.19	28	19
FG-SiO2-nm	583.778	-26.2522	0.0190663	Heat shock cognate 71 kDa protein	71241	5.37	20	30	7	650	28	54	7	46	49	4	55	27	50	46	44	44	14	24	2	15	0	0	0	3	8	7	6	7	0	0	0	0	0	0	0.13	20	12
FG-SiO2-um	3491.92	-19.1167	0.0105373	Heat shock cognate 71 kDa protein	71241	5.37	20	30	7	650	28	54	7	46	49	4	55	27	50	46	44	44	14	24	2	15	0	0	0	3	8	7	6	7	0	0	0	0	0	0	0.15	21	13
FG-TiO2-nm	616.497	-35.485	0.015372	Heat shock cognate 71 kDa protein	71241	5.37	20	30	7	650	28	54	7	46	49	4	55	27	50	46	44	44	14	24	2	15	0	0	0	3	8	7	6	7	0	0	0	0	0	0	0.34	43	38
E171	252.627	-56.6533	0.0146964	Heat shock cognate 71 kDa protein	71241	5.37	20	30	7	650	28	54	7	46	49	4	55	27	50	46	44	44	14	24	2	15	0	0	0	3	8	7	6	7	0	0	0	0	0	0	0.3	39	30
Milk	0	0	0	Fatty acid-binding protein, heart	14779	6.91	2	10	3	133	4	13	2	10	7	1	11	1	5	15	7	9	4	6	2	2	0	0	0	1	1	0	0	1	0	0	0	0	0	0	0.33	59	33
FG-SiO2-nm	583.778	-26.2522	0.0190663	Fatty acid-binding protein, heart	14779	6.91	2	10	3	133	4	13	2	10	7	1	11	1	5	15	7	9	4	6	2	2	0	0	0	1	1	0	0	1	0	0	0	0	0	0	0.24	52	22
FG-SiO2-um	3491.92	-19.1167	0.0105373	Fatty acid-binding protein, heart	14779	6.91	2	10	3	133	4	13	2	10	7	1	11	1	5	15	7	9	4	6	2	2	0	0	0	1	1	0	0	1	0	0	0	0	0	0	0.17	59	15
FG-TiO2-nm	616.497	-35.485	0.015372	Fatty acid-binding protein, heart	14779	6.91	2	10	3	133	4	13	2	10	7	1	11	1	5	15	7	9	4	6	2	2	0	0	0	1	1	0	0	1	0	0	0	0	0	0	0.27	65	30
E171	252.627	-56.6533	0.0146964	Fatty acid-binding protein, heart	14779	6.91	2	10	3	133	4	13	2	10	7	1	11	1	5	15	7	9	4	6	2	2	0	0	0	1	1	0	0	1	0	0	0	0	0	0	0.26	73	26
Milk	0	0	0	Sodium-dependent phosphate transport protein 2B	75826	7.65	0	0	0	693	17	41	6	23	33	26	41	35	44	58	57	83	13	35	14	11	0	0	1	1	5	4	15	9	0	0	0	0	0	0	0.15	13	15
FG-SiO2-nm	583.778	-26.2522	0.0190663	Sodium-dependent phosphate transport protein 2B	75826	7.65	0	0	0	693	17	41	6	23	33	26	41	35	44	58	57	83	13	35	14	11	0	0	1	1	5	4	15	9	0	0	0	0	0	0	0.098	15	9
FG-SiO2-um	3491.92	-19.1167	0.0105373	Sodium-dependent phosphate transport protein 2B	75826	7.65	0	0	0	693	17	41	6	23	33	26	41	35	44	58	57	83	13	35	14	11	0	0	1	1	5	4	15	9	0	0	0	0	0	0	0.081	15	7
FG-TiO2-nm	616.497	-35.485	0.015372	Sodium-dependent phosphate transport protein 2B	75826	7.65	0	0	0	693	17	41	6	23	33	26	41	35	44	58	57	83	13	35	14	11	0	0	1	1	5	4	15	9	0	0	0	0	0	0	0.23	18	25
E171	252.627	-56.6533	0.0146964	Sodium-dependent phosphate transport protein 2B	75826	7.65	0	0	0	693	17	41	6	23	33	26	41	35	44	58	57	83	13	35	14	11	0	0	1	1	5	4	15	9	0	0	0	0	0	0	0.26	19	26

## Sheet: 20 enrich proteins
Particles	Hydrodynamic size	Zetapotential	Hydrophobicity	Protein	MW	PI	Helix	Beta strand	Turn	AAR	No. Arg (R)	No. Lys (K)	No. His (H)	No. Asp (D)	No. Glu (E)	No. Cys (C)	No. Gly (G)	No. Pro (P)	No. Ala (A)	No. Val (V)	No. Ile (I)	No. Leu (L)	No. Met (M)	No. Phe (F)	No. Trp (W)	No. Tyr (Y)	Globular Protein	Fibrillar Protein	Disulfide bond	Phosphorylation site (Y)	Phosphorylation site (T)	Phosphorylation site (S)	O-Glycosylation Site	N-Glycosylation site	Cu binding site	Ca binding site	Fe binding site	Zn binding site	Mg binding site	Fe/S binding site	percentage	% of Amino acid Identified	No. of peptide
Milk	0	0	0	Complement factor H	140374	6.33	0	0	0	1236	68	81	31	58	100	82	95	91	47	72	66	55	17	34	26	62	1	0	40	14	9	12	34	2	0	0	0	0	0	0	0	0	0
FG-SiO2-nm	583.778	-26.2522	0.0190663	Complement factor H	140374	6.33	0	0	0	1236	68	81	31	58	100	82	95	91	47	72	66	55	17	34	26	62	1	0	40	14	9	12	34	2	0	0	0	0	0	0	0.74	41	68
FG-SiO2-um	3491.92	-19.1167	0.0105373	Complement factor H	140374	6.33	0	0	0	1236	68	81	31	58	100	82	95	91	47	72	66	55	17	34	26	62	1	0	40	14	9	12	34	2	0	0	0	0	0	0	0.47	35	41
FG-TiO2-nm	616.497	-35.485	0.015372	Complement factor H	140374	6.33	0	0	0	1236	68	81	31	58	100	82	95	91	47	72	66	55	17	34	26	62	1	0	40	14	9	12	34	2	0	0	0	0	0	0	0.027	3.2	3
E171	252.627	-56.6533	0.0146964	Complement factor H	140374	6.33	0	0	0	1236	68	81	31	58	100	82	95	91	47	72	66	55	17	34	26	62	1	0	40	14	9	12	34	2	0	0	0	0	0	0	0.04	4	4
Milk	0	0	0	Cathepsin L1	37347	6.55	0	0	0	334	9	26	10	20	17	9	31	13	25	21	9	20	10	15	10	13	0	0	3	3	1	3	1	2	0	0	0	0	0	0	0	0	0
FG-SiO2-nm	583.778	-26.2522	0.0190663	Cathepsin L1	37347	6.55	0	0	0	334	9	26	10	20	17	9	31	13	25	21	9	20	10	15	10	13	0	0	3	3	1	3	1	2	0	0	0	0	0	0	0.2	38	18
FG-SiO2-um	3491.92	-19.1167	0.0105373	Cathepsin L1	37347	6.55	0	0	0	334	9	26	10	20	17	9	31	13	25	21	9	20	10	15	10	13	0	0	3	3	1	3	1	2	0	0	0	0	0	0	0.14	38	12
FG-TiO2-nm	616.497	-35.485	0.015372	Cathepsin L1	37347	6.55	0	0	0	334	9	26	10	20	17	9	31	13	25	21	9	20	10	15	10	13	0	0	3	3	1	3	1	2	0	0	0	0	0	0	0.063	28	7
E171	252.627	-56.6533	0.0146964	Cathepsin L1	37347	6.55	0	0	0	334	9	26	10	20	17	9	31	13	25	21	9	20	10	15	10	13	0	0	3	3	1	3	1	2	0	0	0	0	0	0	0.03	10	3
Milk	0	0	0	Angiogenin-2	14522	9.97	0	0	0	123	22	2	5	10	4	6	8	12	4	4	6	3	3	6	0	5	0	0	3	0	1	4	2	1	0	0	0	3	0	0	0	0	0
FG-SiO2-nm	583.778	-26.2522	0.0190663	Angiogenin-2	14522	9.97	0	0	0	123	22	2	5	10	4	6	8	12	4	4	6	3	3	6	0	5	0	0	3	0	1	4	2	1	0	0	0	3	0	0	0.13	48	12
FG-SiO2-um	3491.92	-19.1167	0.0105373	Angiogenin-2	14522	9.97	0	0	0	123	22	2	5	10	4	6	8	12	4	4	6	3	3	6	0	5	0	0	3	0	1	4	2	1	0	0	0	3	0	0	0.13	41	11
FG-TiO2-nm	616.497	-35.485	0.015372	Angiogenin-2	14522	9.97	0	0	0	123	22	2	5	10	4	6	8	12	4	4	6	3	3	6	0	5	0	0	3	0	1	4	2	1	0	0	0	3	0	0	0.063	43	7
E171	252.627	-56.6533	0.0146964	Angiogenin-2	14522	9.97	0	0	0	123	22	2	5	10	4	6	8	12	4	4	6	3	3	6	0	5	0	0	3	0	1	4	2	1	0	0	0	3	0	0	0.04	19	4
Milk	0	0	0	Cathelicidin-2	20030	12.54	0	0	0	176	20	4	0	10	9	5	7	28	7	9	6	21	1	10	1	3	0	0	2	0	0	1	3	0	0	0	0	0	0	0	0	0	0
FG-SiO2-nm	583.778	-26.2522	0.0190663	Cathelicidin-2	20030	12.54	0	0	0	176	20	4	0	10	9	5	7	28	7	9	6	21	1	10	1	3	0	0	2	0	0	1	3	0	0	0	0	0	0	0	0.098	39	10
FG-SiO2-um	3491.92	-19.1167	0.0105373	Cathelicidin-2	20030	12.54	0	0	0	176	20	4	0	10	9	5	7	28	7	9	6	21	1	10	1	3	0	0	2	0	0	1	3	0	0	0	0	0	0	0	0.1	44	14
FG-TiO2-nm	616.497	-35.485	0.015372	Cathelicidin-2	20030	12.54	0	0	0	176	20	4	0	10	9	5	7	28	7	9	6	21	1	10	1	3	0	0	2	0	0	1	3	0	0	0	0	0	0	0	0.027	16	3
E171	252.627	-56.6533	0.0146964	Cathelicidin-2	20030	12.54	0	0	0	176	20	4	0	10	9	5	7	28	7	9	6	21	1	10	1	3	0	0	2	0	0	1	3	0	0	0	0	0	0	0	0	0	0
Milk	0	0	0	Moesin	67975	5.9	0	0	0	577	41	61	9	30	80	2	17	15	49	23	26	54	18	19	7	13	0	0	0	3	4	5	18	2	0	0	0	0	0	0	0	0	0
FG-SiO2-nm	583.778	-26.2522	0.0190663	Moesin	67975	5.9	0	0	0	577	41	61	9	30	80	2	17	15	49	23	26	54	18	19	7	13	0	0	0	3	4	5	18	2	0	0	0	0	0	0	0.022	8.5	9
FG-SiO2-um	3491.92	-19.1167	0.0105373	Moesin	67975	5.9	0	0	0	577	41	61	9	30	80	2	17	15	49	23	26	54	18	19	7	13	0	0	0	3	4	5	18	2	0	0	0	0	0	0	0	0	0
FG-TiO2-nm	616.497	-35.485	0.015372	Moesin	67975	5.9	0	0	0	577	41	61	9	30	80	2	17	15	49	23	26	54	18	19	7	13	0	0	0	3	4	5	18	2	0	0	0	0	0	0	0.072	18	18
E171	252.627	-56.6533	0.0146964	Moesin	67975	5.9	0	0	0	577	41	61	9	30	80	2	17	15	49	23	26	54	18	19	7	13	0	0	0	3	4	5	18	2	0	0	0	0	0	0	0.06	16	16
Milk	0	0	0	Tripeptidyl-peptidase 1	61352	5.63	0	0	0	563	33	9	20	21	28	8	54	44	41	44	8	63	5	26	10	20	0	0	3	4	1	15	15	5	0	5	0	0	0	0	0	0	0
FG-SiO2-nm	583.778	-26.2522	0.0190663	Tripeptidyl-peptidase 1	61352	5.63	0	0	0	563	33	9	20	21	28	8	54	44	41	44	8	63	5	26	10	20	0	0	3	4	1	15	15	5	0	5	0	0	0	0	0.098	24	9
FG-SiO2-um	3491.92	-19.1167	0.0105373	Tripeptidyl-peptidase 1	61352	5.63	0	0	0	563	33	9	20	21	28	8	54	44	41	44	8	63	5	26	10	20	0	0	3	4	1	15	15	5	0	5	0	0	0	0	0.058	15	5
FG-TiO2-nm	616.497	-35.485	0.015372	Tripeptidyl-peptidase 1	61352	5.63	0	0	0	563	33	9	20	21	28	8	54	44	41	44	8	63	5	26	10	20	0	0	3	4	1	15	15	5	0	5	0	0	0	0	0.018	4.6	2
E171	252.627	-56.6533	0.0146964	Tripeptidyl-peptidase 1	61352	5.63	0	0	0	563	33	9	20	21	28	8	54	44	41	44	8	63	5	26	10	20	0	0	3	4	1	15	15	5	0	5	0	0	0	0	0	0	0
Milk	0	0	0	Lysosomal alpha-mannosidase	112919	8.99	20	52	6	999	74	37	21	46	48	11	66	60	76	72	28	112	20	41	25	37	0	0	6	3	4	9	8	9	0	0	0	4	0	0	0	0	0
FG-SiO2-nm	583.778	-26.2522	0.0190663	Lysosomal alpha-mannosidase	112919	8.99	20	52	6	999	74	37	21	46	48	11	66	60	76	72	28	112	20	41	25	37	0	0	6	3	4	9	8	9	0	0	0	4	0	0	0.087	9.9	8
FG-SiO2-um	3491.92	-19.1167	0.0105373	Lysosomal alpha-mannosidase	112919	8.99	20	52	6	999	74	37	21	46	48	11	66	60	76	72	28	112	20	41	25	37	0	0	6	3	4	9	8	9	0	0	0	4	0	0	0.1	9.1	9
FG-TiO2-nm	616.497	-35.485	0.015372	Lysosomal alpha-mannosidase	112919	8.99	20	52	6	999	74	37	21	46	48	11	66	60	76	72	28	112	20	41	25	37	0	0	6	3	4	9	8	9	0	0	0	4	0	0	0.036	4.4	4
E171	252.627	-56.6533	0.0146964	Lysosomal alpha-mannosidase	112919	8.99	20	52	6	999	74	37	21	46	48	11	66	60	76	72	28	112	20	41	25	37	0	0	6	3	4	9	8	9	0	0	0	4	0	0	0.03	3.2	3
Milk	0	0	0	Hemoglobin subunit alpha	15184	8.19	7	1	2	142	3	11	10	8	5	0	9	6	20	12	0	20	2	7	1	3	1	0	0	1	0	1	1	1	0	0	2	0	0	0	0	0	0
FG-SiO2-nm	583.778	-26.2522	0.0190663	Hemoglobin subunit alpha	15184	8.19	7	1	2	142	3	11	10	8	5	0	9	6	20	12	0	20	2	7	1	3	1	0	0	1	0	1	1	1	0	0	2	0	0	0	0.087	72	8
FG-SiO2-um	3491.92	-19.1167	0.0105373	Hemoglobin subunit alpha	15184	8.19	7	1	2	142	3	11	10	8	5	0	9	6	20	12	0	20	2	7	1	3	1	0	0	1	0	1	1	1	0	0	2	0	0	0	0.093	63	8
FG-TiO2-nm	616.497	-35.485	0.015372	Hemoglobin subunit alpha	15184	8.19	7	1	2	142	3	11	10	8	5	0	9	6	20	12	0	20	2	7	1	3	1	0	0	1	0	1	1	1	0	0	2	0	0	0	0.045	57	5
E171	252.627	-56.6533	0.0146964	Hemoglobin subunit alpha	15184	8.19	7	1	2	142	3	11	10	8	5	0	9	6	20	12	0	20	2	7	1	3	1	0	0	1	0	1	1	1	0	0	2	0	0	0	0.03	37	3
Milk	0	0	0	Heat shock 70 kDa protein 1A	70259	5.68	0	0	0	641	34	49	8	45	47	5	54	23	56	45	42	50	10	25	2	14	0	0	0	1	5	10	5	5	0	0	0	0	0	0	0	0	0
FG-SiO2-nm	583.778	-26.2522	0.0190663	Heat shock 70 kDa protein 1A	70259	5.68	0	0	0	641	34	49	8	45	47	5	54	23	56	45	42	50	10	25	2	14	0	0	0	1	5	10	5	5	0	0	0	0	0	0	0.043	13	7
FG-SiO2-um	3491.92	-19.1167	0.0105373	Heat shock 70 kDa protein 1A	70259	5.68	0	0	0	641	34	49	8	45	47	5	54	23	56	45	42	50	10	25	2	14	0	0	0	1	5	10	5	5	0	0	0	0	0	0	0.035	9.5	5
FG-TiO2-nm	616.497	-35.485	0.015372	Heat shock 70 kDa protein 1A	70259	5.68	0	0	0	641	34	49	8	45	47	5	54	23	56	45	42	50	10	25	2	14	0	0	0	1	5	10	5	5	0	0	0	0	0	0	0.072	20	12
E171	252.627	-56.6533	0.0146964	Heat shock 70 kDa protein 1A	70259	5.68	0	0	0	641	34	49	8	45	47	5	54	23	56	45	42	50	10	25	2	14	0	0	0	1	5	10	5	5	0	0	0	0	0	0	0.06	17	9
Milk	0	0	0	Complement component C6	104541	6.59	0	0	0	932	55	60	15	48	69	64	65	46	39	45	37	67	12	39	13	28	0	0	32	7	5	16	25	3	0	0	0	0	0	0	0	0	0
FG-SiO2-nm	583.778	-26.2522	0.0190663	Complement component C6	104541	6.59	0	0	0	932	55	60	15	48	69	64	65	46	39	45	37	67	12	39	13	28	0	0	32	7	5	16	25	3	0	0	0	0	0	0	0.076	10	7
FG-SiO2-um	3491.92	-19.1167	0.0105373	Complement component C6	104541	6.59	0	0	0	932	55	60	15	48	69	64	65	46	39	45	37	67	12	39	13	28	0	0	32	7	5	16	25	3	0	0	0	0	0	0	0.1	11	9
FG-TiO2-nm	616.497	-35.485	0.015372	Complement component C6	104541	6.59	0	0	0	932	55	60	15	48	69	64	65	46	39	45	37	67	12	39	13	28	0	0	32	7	5	16	25	3	0	0	0	0	0	0	0	0	0
E171	252.627	-56.6533	0.0146964	Complement component C6	104541	6.59	0	0	0	932	55	60	15	48	69	64	65	46	39	45	37	67	12	39	13	28	0	0	32	7	5	16	25	3	0	0	0	0	0	0	0	0	0
Milk	0	0	0	Heat shock protein HSP 90-alpha	84731	4.92	0	0	0	733	30	80	12	55	97	7	32	21	35	38	50	62	20	25	4	25	1	0	0	6	0	3	6	4	0	0	0	0	0	0	0	0	0
FG-SiO2-nm	583.778	-26.2522	0.0190663	Heat shock protein HSP 90-alpha	84731	4.92	0	0	0	733	30	80	12	55	97	7	32	21	35	38	50	62	20	25	4	25	1	0	0	6	0	3	6	4	0	0	0	0	0	0	0.022	9.3	6
FG-SiO2-um	3491.92	-19.1167	0.0105373	Heat shock protein HSP 90-alpha	84731	4.92	0	0	0	733	30	80	12	55	97	7	32	21	35	38	50	62	20	25	4	25	1	0	0	6	0	3	6	4	0	0	0	0	0	0	0	0	0
FG-TiO2-nm	616.497	-35.485	0.015372	Heat shock protein HSP 90-alpha	84731	4.92	0	0	0	733	30	80	12	55	97	7	32	21	35	38	50	62	20	25	4	25	1	0	0	6	0	3	6	4	0	0	0	0	0	0	0.045	15	9
E171	252.627	-56.6533	0.0146964	Heat shock protein HSP 90-alpha	84731	4.92	0	0	0	733	30	80	12	55	97	7	32	21	35	38	50	62	20	25	4	25	1	0	0	6	0	3	6	4	0	0	0	0	0	0	0.05	17	12
Milk	0	0	0	Coagulation factor XII	67160	7.91	0	0	0	612	36	23	27	25	30	42	53	51	54	31	11	56	4	20	16	14	0	0	20	3	6	2	28	3	0	0	0	0	0	0	0	0	0
FG-SiO2-nm	583.778	-26.2522	0.0190663	Coagulation factor XII	67160	7.91	0	0	0	612	36	23	27	25	30	42	53	51	54	31	11	56	4	20	16	14	0	0	20	3	6	2	28	3	0	0	0	0	0	0	0.065	12	6
FG-SiO2-um	3491.92	-19.1167	0.0105373	Coagulation factor XII	67160	7.91	0	0	0	612	36	23	27	25	30	42	53	51	54	31	11	56	4	20	16	14	0	0	20	3	6	2	28	3	0	0	0	0	0	0	0.023	3.6	2
FG-TiO2-nm	616.497	-35.485	0.015372	Coagulation factor XII	67160	7.91	0	0	0	612	36	23	27	25	30	42	53	51	54	31	11	56	4	20	16	14	0	0	20	3	6	2	28	3	0	0	0	0	0	0	0	0	0
E171	252.627	-56.6533	0.0146964	Coagulation factor XII	67160	7.91	0	0	0	612	36	23	27	25	30	42	53	51	54	31	11	56	4	20	16	14	0	0	20	3	6	2	28	3	0	0	0	0	0	0	0	0	0
Milk	0	0	0	Protein S100-A12	10685	5.9	0	0	0	92	3	10	5	9	7	0	3	2	3	7	8	10	1	5	0	1	0	0	0	0	0	0	1	0	4	2	0	0	0	0	0	0	0
FG-SiO2-nm	583.778	-26.2522	0.0190663	Protein S100-A12	10685	5.9	0	0	0	92	3	10	5	9	7	0	3	2	3	7	8	10	1	5	0	1	0	0	0	0	0	0	1	0	4	2	0	0	0	0	0.054	32	5
FG-SiO2-um	3491.92	-19.1167	0.0105373	Protein S100-A12	10685	5.9	0	0	0	92	3	10	5	9	7	0	3	2	3	7	8	10	1	5	0	1	0	0	0	0	0	0	1	0	4	2	0	0	0	0	0.13	42	11
FG-TiO2-nm	616.497	-35.485	0.015372	Protein S100-A12	10685	5.9	0	0	0	92	3	10	5	9	7	0	3	2	3	7	8	10	1	5	0	1	0	0	0	0	0	0	1	0	4	2	0	0	0	0	0	0	0
E171	252.627	-56.6533	0.0146964	Protein S100-A12	10685	5.9	0	0	0	92	3	10	5	9	7	0	3	2	3	7	8	10	1	5	0	1	0	0	0	0	0	0	1	0	4	2	0	0	0	0	0	0	0
Milk	0	0	0	Protein disulfide-isomerase A3	56930	5.78	0	0	0	505	23	51	9	34	44	7	31	25	42	30	20	43	8	29	3	19	0	0	4	2	0	3	3	0	0	0	0	0	0	0	0	0	0
FG-SiO2-nm	583.778	-26.2522	0.0190663	Protein disulfide-isomerase A3	56930	5.78	0	0	0	505	23	51	9	34	44	7	31	25	42	30	20	43	8	29	3	19	0	0	4	2	0	3	3	0	0	0	0	0	0	0	0.054	12	5
FG-SiO2-um	3491.92	-19.1167	0.0105373	Protein disulfide-isomerase A3	56930	5.78	0	0	0	505	23	51	9	34	44	7	31	25	42	30	20	43	8	29	3	19	0	0	4	2	0	3	3	0	0	0	0	0	0	0	0.058	9.9	5
FG-TiO2-nm	616.497	-35.485	0.015372	Protein disulfide-isomerase A3	56930	5.78	0	0	0	505	23	51	9	34	44	7	31	25	42	30	20	43	8	29	3	19	0	0	4	2	0	3	3	0	0	0	0	0	0	0	0	0	0
E171	252.627	-56.6533	0.0146964	Protein disulfide-isomerase A3	56930	5.78	0	0	0	505	23	51	9	34	44	7	31	25	42	30	20	43	8	29	3	19	0	0	4	2	0	3	3	0	0	0	0	0	0	0	0	0	0
Milk	0	0	0	Histone H2B type 1	13906	10.32	0	0	0	126	8	20	3	3	7	0	7	6	13	9	6	6	3	2	0	5	0	0	0	1	0	4	6	0	0	0	0	0	0	0	0	0	0
FG-SiO2-nm	583.778	-26.2522	0.0190663	Histone H2B type 1	13906	10.32	0	0	0	126	8	20	3	3	7	0	7	6	13	9	6	6	3	2	0	5	0	0	0	1	0	4	6	0	0	0	0	0	0	0	0.054	40	5
FG-SiO2-um	3491.92	-19.1167	0.0105373	Histone H2B type 1	13906	10.32	0	0	0	126	8	20	3	3	7	0	7	6	13	9	6	6	3	2	0	5	0	0	0	1	0	4	6	0	0	0	0	0	0	0	0	0	0
FG-TiO2-nm	616.497	-35.485	0.015372	Histone H2B type 1	13906	10.32	0	0	0	126	8	20	3	3	7	0	7	6	13	9	6	6	3	2	0	5	0	0	0	1	0	4	6	0	0	0	0	0	0	0	0	0	0
E171	252.627	-56.6533	0.0146964	Histone H2B type 1	13906	10.32	0	0	0	126	8	20	3	3	7	0	7	6	13	9	6	6	3	2	0	5	0	0	0	1	0	4	6	0	0	0	0	0	0	0	0	0	0
Milk	0	0	0	Histatherin	7233	9.99	0	0	0	58	6	5	3	1	2	0	1	6	4	0	6	3	3	5	0	6	0	0	0	2	0	1	0	0	0	0	0	0	0	0	0	0	0
FG-SiO2-nm	583.778	-26.2522	0.0190663	Histatherin	7233	9.99	0	0	0	58	6	5	3	1	2	0	1	6	4	0	6	3	3	5	0	6	0	0	0	2	0	1	0	0	0	0	0	0	0	0	0.043	40	4
FG-SiO2-um	3491.92	-19.1167	0.0105373	Histatherin	7233	9.99	0	0	0	58	6	5	3	1	2	0	1	6	4	0	6	3	3	5	0	6	0	0	0	2	0	1	0	0	0	0	0	0	0	0	0.093	40	8
FG-TiO2-nm	616.497	-35.485	0.015372	Histatherin	7233	9.99	0	0	0	58	6	5	3	1	2	0	1	6	4	0	6	3	3	5	0	6	0	0	0	2	0	1	0	0	0	0	0	0	0	0	0.15	40	17
E171	252.627	-56.6533	0.0146964	Histatherin	7233	9.99	0	0	0	58	6	5	3	1	2	0	1	6	4	0	6	3	3	5	0	6	0	0	0	2	0	1	0	0	0	0	0	0	0	0	0.16	40	16
Milk	0	0	0	14-3-3 protein epsilon	29174	4.63	0	0	0	255	14	18	3	22	29	3	10	5	25	13	13	27	10	5	2	12	0	0	0	4	1	3	0	2	0	0	0	0	0	0	0	0	0
FG-SiO2-nm	583.778	-26.2522	0.0190663	14-3-3 protein epsilon	29174	4.63	0	0	0	255	14	18	3	22	29	3	10	5	25	13	13	27	10	5	2	12	0	0	0	4	1	3	0	2	0	0	0	0	0	0	0.043	16	4
FG-SiO2-um	3491.92	-19.1167	0.0105373	14-3-3 protein epsilon	29174	4.63	0	0	0	255	14	18	3	22	29	3	10	5	25	13	13	27	10	5	2	12	0	0	0	4	1	3	0	2	0	0	0	0	0	0	0.058	22	5
FG-TiO2-nm	616.497	-35.485	0.015372	14-3-3 protein epsilon	29174	4.63	0	0	0	255	14	18	3	22	29	3	10	5	25	13	13	27	10	5	2	12	0	0	0	4	1	3	0	2	0	0	0	0	0	0	0.15	47	17
E171	252.627	-56.6533	0.0146964	14-3-3 protein epsilon	29174	4.63	0	0	0	255	14	18	3	22	29	3	10	5	25	13	13	27	10	5	2	12	0	0	0	4	1	3	0	2	0	0	0	0	0	0	0.11	31	11
Milk	0	0	0	Chloride intracellular channel protein 4	28727	5.6	0	0	0	253	9	25	3	16	22	4	12	17	14	13	14	28	7	13	2	7	0	0	0	0	0	0	0	0	0	0	0	0	0	0	0	0	0
FG-SiO2-nm	583.778	-26.2522	0.0190663	Chloride intracellular channel protein 4	28727	5.6	0	0	0	253	9	25	3	16	22	4	12	17	14	13	14	28	7	13	2	7	0	0	0	0	0	0	0	0	0	0	0	0	0	0	0.043	11	4
FG-SiO2-um	3491.92	-19.1167	0.0105373	Chloride intracellular channel protein 4	28727	5.6	0	0	0	253	9	25	3	16	22	4	12	17	14	13	14	28	7	13	2	7	0	0	0	0	0	0	0	0	0	0	0	0	0	0	0	0	0
FG-TiO2-nm	616.497	-35.485	0.015372	Chloride intracellular channel protein 4	28727	5.6	0	0	0	253	9	25	3	16	22	4	12	17	14	13	14	28	7	13	2	7	0	0	0	0	0	0	0	0	0	0	0	0	0	0	0.18	41	20
E171	252.627	-56.6533	0.0146964	Chloride intracellular channel protein 4	28727	5.6	0	0	0	253	9	25	3	16	22	4	12	17	14	13	14	28	7	13	2	7	0	0	0	0	0	0	0	0	0	0	0	0	0	0	0.13	41	13
Milk	0	0	0	Annexin A1	38952	6.41	0	0	0	346	20	33	6	24	31	5	19	8	31	19	23	37	8	8	1	12	0	0	1	3	3	2	4	1	0	26	0	0	0	0	0	0	0
FG-SiO2-nm	583.778	-26.2522	0.0190663	Annexin A1	38952	6.41	0	0	0	346	20	33	6	24	31	5	19	8	31	19	23	37	8	8	1	12	0	0	1	3	3	2	4	1	0	26	0	0	0	0	0.043	13	4
FG-SiO2-um	3491.92	-19.1167	0.0105373	Annexin A1	38952	6.41	0	0	0	346	20	33	6	24	31	5	19	8	31	19	23	37	8	8	1	12	0	0	1	3	3	2	4	1	0	26	0	0	0	0	0.035	12	3
FG-TiO2-nm	616.497	-35.485	0.015372	Annexin A1	38952	6.41	0	0	0	346	20	33	6	24	31	5	19	8	31	19	23	37	8	8	1	12	0	0	1	3	3	2	4	1	0	26	0	0	0	0	0.081	29	9
E171	252.627	-56.6533	0.0146964	Annexin A1	38952	6.41	0	0	0	346	20	33	6	24	31	5	19	8	31	19	23	37	8	8	1	12	0	0	1	3	3	2	4	1	0	26	0	0	0	0	0.04	15	4
Milk	0	0	0	Protein S100-A8	10460	5.11	0	0	0	89	1	11	4	8	10	2	4	1	4	5	6	11	2	4	1	4	0	0	0	1	0	0	0	0	0	2	0	3	0	0	0	0	0
FG-SiO2-nm	583.778	-26.2522	0.0190663	Protein S100-A8	10460	5.11	0	0	0	89	1	11	4	8	10	2	4	1	4	5	6	11	2	4	1	4	0	0	0	1	0	0	0	0	0	2	0	3	0	0	0.043	24	4
FG-SiO2-um	3491.92	-19.1167	0.0105373	Protein S100-A8	10460	5.11	0	0	0	89	1	11	4	8	10	2	4	1	4	5	6	11	2	4	1	4	0	0	0	1	0	0	0	0	0	2	0	3	0	0	0.093	53	8
FG-TiO2-nm	616.497	-35.485	0.015372	Protein S100-A8	10460	5.11	0	0	0	89	1	11	4	8	10	2	4	1	4	5	6	11	2	4	1	4	0	0	0	1	0	0	0	0	0	2	0	3	0	0	0.018	34	2
E171	252.627	-56.6533	0.0146964	Protein S100-A8	10460	5.11	0	0	0	89	1	11	4	8	10	2	4	1	4	5	6	11	2	4	1	4	0	0	0	1	0	0	0	0	0	2	0	3	0	0	0	0	0
Milk	0	0	0	Cathelicidin-3	21567	13.2	0	0	0	190	27	5	0	9	10	4	8	27	8	9	6	25	1	6	2	2	0	0	2	0	1	2	8	0	0	0	0	0	0	0	0	0	0
FG-SiO2-nm	583.778	-26.2522	0.0190663	Cathelicidin-3	21567	13.2	0	0	0	190	27	5	0	9	10	4	8	27	8	9	6	25	1	6	2	2	0	0	2	0	1	2	8	0	0	0	0	0	0	0	0.033	17	3
FG-SiO2-um	3491.92	-19.1167	0.0105373	Cathelicidin-3	21567	13.2	0	0	0	190	27	5	0	9	10	4	8	27	8	9	6	25	1	6	2	2	0	0	2	0	1	2	8	0	0	0	0	0	0	0	0.046	35	9
FG-TiO2-nm	616.497	-35.485	0.015372	Cathelicidin-3	21567	13.2	0	0	0	190	27	5	0	9	10	4	8	27	8	9	6	25	1	6	2	2	0	0	2	0	1	2	8	0	0	0	0	0	0	0	0	0	0
E171	252.627	-56.6533	0.0146964	Cathelicidin-3	21567	13.2	0	0	0	190	27	5	0	9	10	4	8	27	8	9	6	25	1	6	2	2	0	0	2	0	1	2	8	0	0	0	0	0	0	0	0	0	0
Milk	0	0	0	Cathelicidin-6	17852	12.32	2	0	0	158	11	14	1	6	12	4	7	11	10	12	3	23	1	7	2	2	0	0	2	0	0	2	4	1	0	0	0	0	0	0	0	0	0
FG-SiO2-nm	583.778	-26.2522	0.0190663	Cathelicidin-6	17852	12.32	2	0	0	158	11	14	1	6	12	4	7	11	10	12	3	23	1	7	2	2	0	0	2	0	0	2	4	1	0	0	0	0	0	0	0.022	13	2
FG-SiO2-um	3491.92	-19.1167	0.0105373	Cathelicidin-6	17852	12.32	2	0	0	158	11	14	1	6	12	4	7	11	10	12	3	23	1	7	2	2	0	0	2	0	0	2	4	1	0	0	0	0	0	0	0.093	24	8
FG-TiO2-nm	616.497	-35.485	0.015372	Cathelicidin-6	17852	12.32	2	0	0	158	11	14	1	6	12	4	7	11	10	12	3	23	1	7	2	2	0	0	2	0	0	2	4	1	0	0	0	0	0	0	0.027	27	3
E171	252.627	-56.6533	0.0146964	Cathelicidin-6	17852	12.32	2	0	0	158	11	14	1	6	12	4	7	11	10	12	3	23	1	7	2	2	0	0	2	0	0	2	4	1	0	0	0	0	0	0	0.02	16	2
Milk	0	0	0	Hemoglobin subunit beta	15954	7.02	9	0	1	145	4	13	6	9	8	1	11	4	16	18	0	17	3	10	2	2	1	0	0	0	1	0	0	0	0	0	2	0	0	0	0	0	0
FG-SiO2-nm	583.778	-26.2522	0.0190663	Hemoglobin subunit beta	15954	7.02	9	0	1	145	4	13	6	9	8	1	11	4	16	18	0	17	3	10	2	2	1	0	0	0	1	0	0	0	0	0	2	0	0	0	0.043	30	4
FG-SiO2-um	3491.92	-19.1167	0.0105373	Hemoglobin subunit beta	15954	7.02	9	0	1	145	4	13	6	9	8	1	11	4	16	18	0	17	3	10	2	2	1	0	0	0	1	0	0	0	0	0	2	0	0	0	0.07	39	6
FG-TiO2-nm	616.497	-35.485	0.015372	Hemoglobin subunit beta	15954	7.02	9	0	1	145	4	13	6	9	8	1	11	4	16	18	0	17	3	10	2	2	1	0	0	0	1	0	0	0	0	0	2	0	0	0	0.018	13	2
E171	252.627	-56.6533	0.0146964	Hemoglobin subunit beta	15954	7.02	9	0	1	145	4	13	6	9	8	1	11	4	16	18	0	17	3	10	2	2	1	0	0	0	1	0	0	0	0	0	2	0	0	0	0.02	15	2
Milk	0	0	0	Selenoprotein P	45488	7.26	0	0	0	402	13	27	31	16	24	16	20	34	19	19	10	43	3	6	3	12	0	0	0	1	3	7	20	3	0	0	0	0	0	0	0	0	0
FG-SiO2-nm	583.778	-26.2522	0.0190663	Selenoprotein P	45488	7.26	0	0	0	402	13	27	31	16	24	16	20	34	19	19	10	43	3	6	3	12	0	0	0	1	3	7	20	3	0	0	0	0	0	0	0.022	8	2
FG-SiO2-um	3491.92	-19.1167	0.0105373	Selenoprotein P	45488	7.26	0	0	0	402	13	27	31	16	24	16	20	34	19	19	10	43	3	6	3	12	0	0	0	1	3	7	20	3	0	0	0	0	0	0	0.07	12	6
FG-TiO2-nm	616.497	-35.485	0.015372	Selenoprotein P	45488	7.26	0	0	0	402	13	27	31	16	24	16	20	34	19	19	10	43	3	6	3	12	0	0	0	1	3	7	20	3	0	0	0	0	0	0	0	0	0
E171	252.627	-56.6533	0.0146964	Selenoprotein P	45488	7.26	0	0	0	402	13	27	31	16	24	16	20	34	19	19	10	43	3	6	3	12	0	0	0	1	3	7	20	3	0	0	0	0	0	0	0	0	0
Milk	0	0	0	14-3-3 protein beta/alpha	28081	4.8	0	0	0	246	10	20	2	14	29	2	10	5	21	11	10	24	8	6	2	11	0	0	0	3	0	3	3	3	0	0	0	0	0	0	0	0	0
FG-SiO2-nm	583.778	-26.2522	0.0190663	14-3-3 protein beta/alpha	28081	4.8	0	0	0	246	10	20	2	14	29	2	10	5	21	11	10	24	8	6	2	11	0	0	0	3	0	3	3	3	0	0	0	0	0	0	0	0	0
FG-SiO2-um	3491.92	-19.1167	0.0105373	14-3-3 protein beta/alpha	28081	4.8	0	0	0	246	10	20	2	14	29	2	10	5	21	11	10	24	8	6	2	11	0	0	0	3	0	3	3	3	0	0	0	0	0	0	0.035	13	4
FG-TiO2-nm	616.497	-35.485	0.015372	14-3-3 protein beta/alpha	28081	4.8	0	0	0	246	10	20	2	14	29	2	10	5	21	11	10	24	8	6	2	11	0	0	0	3	0	3	3	3	0	0	0	0	0	0	0.081	41	13
E171	252.627	-56.6533	0.0146964	14-3-3 protein beta/alpha	28081	4.8	0	0	0	246	10	20	2	14	29	2	10	5	21	11	10	24	8	6	2	11	0	0	0	3	0	3	3	3	0	0	0	0	0	0	0.05	26	8
Milk	0	0	0	Transketolase	67906	7.56	0	0	0	623	30	42	15	37	34	12	46	30	72	37	46	46	15	24	4	16	0	0	0	2	4	3	6	0	0	0	0	0	3	0	0	0	0
FG-SiO2-nm	583.778	-26.2522	0.0190663	Transketolase	67906	7.56	0	0	0	623	30	42	15	37	34	12	46	30	72	37	46	46	15	24	4	16	0	0	0	2	4	3	6	0	0	0	0	0	3	0	0.022	6.9	2
FG-SiO2-um	3491.92	-19.1167	0.0105373	Transketolase	67906	7.56	0	0	0	623	30	42	15	37	34	12	46	30	72	37	46	46	15	24	4	16	0	0	0	2	4	3	6	0	0	0	0	0	3	0	0.046	11	4
FG-TiO2-nm	616.497	-35.485	0.015372	Transketolase	67906	7.56	0	0	0	623	30	42	15	37	34	12	46	30	72	37	46	46	15	24	4	16	0	0	0	2	4	3	6	0	0	0	0	0	3	0	0.09	13	10
E171	252.627	-56.6533	0.0146964	Transketolase	67906	7.56	0	0	0	623	30	42	15	37	34	12	46	30	72	37	46	46	15	24	4	16	0	0	0	2	4	3	6	0	0	0	0	0	3	0	0.09	14	9
Milk	0	0	0	Elongation factor 2	95368	6.41	0	0	0	858	44	65	16	53	61	17	66	46	61	69	54	73	28	35	7	21	0	0	0	3	3	5	10	5	0	0	0	0	0	0	0	0	0
FG-SiO2-nm	583.778	-26.2522	0.0190663	Elongation factor 2	95368	6.41	0	0	0	858	44	65	16	53	61	17	66	46	61	69	54	73	28	35	7	21	0	0	0	3	3	5	10	5	0	0	0	0	0	0	0	0	0
FG-SiO2-um	3491.92	-19.1167	0.0105373	Elongation factor 2	95368	6.41	0	0	0	858	44	65	16	53	61	17	66	46	61	69	54	73	28	35	7	21	0	0	0	3	3	5	10	5	0	0	0	0	0	0	0	0	0
FG-TiO2-nm	616.497	-35.485	0.015372	Elongation factor 2	95368	6.41	0	0	0	858	44	65	16	53	61	17	66	46	61	69	54	73	28	35	7	21	0	0	0	3	3	5	10	5	0	0	0	0	0	0	0.19	23	21
E171	252.627	-56.6533	0.0146964	Elongation factor 2	95368	6.41	0	0	0	858	44	65	16	53	61	17	66	46	61	69	54	73	28	35	7	21	0	0	0	3	3	5	10	5	0	0	0	0	0	0	0.16	17	16
Milk	0	0	0	Keratin, type I cytoskeletal 10	54848	5.05	0	0	0	526	26	21	5	18	44	3	108	3	19	14	21	46	6	13	2	26	0	1	1	10	4	15	43	2	0	0	0	0	0	0	0	0	0
FG-SiO2-nm	583.778	-26.2522	0.0190663	Keratin, type I cytoskeletal 10	54848	5.05	0	0	0	526	26	21	5	18	44	3	108	3	19	14	21	46	6	13	2	26	0	1	1	10	4	15	43	2	0	0	0	0	0	0	0.022	3.8	2
FG-SiO2-um	3491.92	-19.1167	0.0105373	Keratin, type I cytoskeletal 10	54848	5.05	0	0	0	526	26	21	5	18	44	3	108	3	19	14	21	46	6	13	2	26	0	1	1	10	4	15	43	2	0	0	0	0	0	0	0.035	5.9	3
FG-TiO2-nm	616.497	-35.485	0.015372	Keratin, type I cytoskeletal 10	54848	5.05	0	0	0	526	26	21	5	18	44	3	108	3	19	14	21	46	6	13	2	26	0	1	1	10	4	15	43	2	0	0	0	0	0	0	0.14	12	16
E171	252.627	-56.6533	0.0146964	Keratin, type I cytoskeletal 10	54848	5.05	0	0	0	526	26	21	5	18	44	3	108	3	19	14	21	46	6	13	2	26	0	1	1	10	4	15	43	2	0	0	0	0	0	0	0.15	12	15
Milk	0	0	0	Na(+)/H(+) exchange regulatory cofactor NHE-RF1	39603	5.29	0	0	0	368	24	24	7	17	42	5	30	32	38	3	9	29	5	7	1	3	0	0	0	0	2	13	27	0	0	0	0	0	0	0	0	0	0
FG-SiO2-nm	583.778	-26.2522	0.0190663	Na(+)/H(+) exchange regulatory cofactor NHE-RF1	39603	5.29	0	0	0	368	24	24	7	17	42	5	30	32	38	3	9	29	5	7	1	3	0	0	0	0	2	13	27	0	0	0	0	0	0	0	0.022	6.8	2
FG-SiO2-um	3491.92	-19.1167	0.0105373	Na(+)/H(+) exchange regulatory cofactor NHE-RF1	39603	5.29	0	0	0	368	24	24	7	17	42	5	30	32	38	3	9	29	5	7	1	3	0	0	0	0	2	13	27	0	0	0	0	0	0	0	0	0	0
FG-TiO2-nm	616.497	-35.485	0.015372	Na(+)/H(+) exchange regulatory cofactor NHE-RF1	39603	5.29	0	0	0	368	24	24	7	17	42	5	30	32	38	3	9	29	5	7	1	3	0	0	0	0	2	13	27	0	0	0	0	0	0	0	0.14	36	15
E171	252.627	-56.6533	0.0146964	Na(+)/H(+) exchange regulatory cofactor NHE-RF1	39603	5.29	0	0	0	368	24	24	7	17	42	5	30	32	38	3	9	29	5	7	1	3	0	0	0	0	2	13	27	0	0	0	0	0	0	0	0.08	19	8
Milk	0	0	0	Cytoplasmic aconitate hydratase	98204	8.11	0	0	0	889	42	54	18	51	42	10	71	55	66	31	54	78	20	42	7	31	0	0	0	6	3	5	5	4	0	0	0	0	0	3	0	0	0
FG-SiO2-nm	583.778	-26.2522	0.0190663	Cytoplasmic aconitate hydratase	98204	8.11	0	0	0	889	42	54	18	51	42	10	71	55	66	31	54	78	20	42	7	31	0	0	0	6	3	5	5	4	0	0	0	0	0	3	0.033	4.8	3
FG-SiO2-um	3491.92	-19.1167	0.0105373	Cytoplasmic aconitate hydratase	98204	8.11	0	0	0	889	42	54	18	51	42	10	71	55	66	31	54	78	20	42	7	31	0	0	0	6	3	5	5	4	0	0	0	0	0	3	0	0	0
FG-TiO2-nm	616.497	-35.485	0.015372	Cytoplasmic aconitate hydratase	98204	8.11	0	0	0	889	42	54	18	51	42	10	71	55	66	31	54	78	20	42	7	31	0	0	0	6	3	5	5	4	0	0	0	0	0	3	0.13	21	14
E171	252.627	-56.6533	0.0146964	Cytoplasmic aconitate hydratase	98204	8.11	0	0	0	889	42	54	18	51	42	10	71	55	66	31	54	78	20	42	7	31	0	0	0	6	3	5	5	4	0	0	0	0	0	3	0.12	18	12
Milk	0	0	0	UTP--glucose-1-phosphate uridylyltransferase	56903	7.69	0	0	0	508	20	41	11	28	32	3	34	24	20	41	32	55	10	22	3	14	0	0	0	4	0	4	3	6	0	0	0	0	2	0	0	0	0
FG-SiO2-nm	583.778	-26.2522	0.0190663	UTP--glucose-1-phosphate uridylyltransferase	56903	7.69	0	0	0	508	20	41	11	28	32	3	34	24	20	41	32	55	10	22	3	14	0	0	0	4	0	4	3	6	0	0	0	0	2	0	0.022	4.5	2
FG-SiO2-um	3491.92	-19.1167	0.0105373	UTP--glucose-1-phosphate uridylyltransferase	56903	7.69	0	0	0	508	20	41	11	28	32	3	34	24	20	41	32	55	10	22	3	14	0	0	0	4	0	4	3	6	0	0	0	0	2	0	0	0	0
FG-TiO2-nm	616.497	-35.485	0.015372	UTP--glucose-1-phosphate uridylyltransferase	56903	7.69	0	0	0	508	20	41	11	28	32	3	34	24	20	41	32	55	10	22	3	14	0	0	0	4	0	4	3	6	0	0	0	0	2	0	0.11	17	12
E171	252.627	-56.6533	0.0146964	UTP--glucose-1-phosphate uridylyltransferase	56903	7.69	0	0	0	508	20	41	11	28	32	3	34	24	20	41	32	55	10	22	3	14	0	0	0	4	0	4	3	6	0	0	0	0	2	0	0.13	22	13
Milk	0	0	0	Vacuolar protein sorting-associated protein 4B	49264	7.07	0	0	0	444	21	43	7	29	35	4	30	25	38	25	23	42	8	15	5	9	0	0	0	2	5	6	6	4	0	0	0	0	0	0	0	0	0
FG-SiO2-nm	583.778	-26.2522	0.0190663	Vacuolar protein sorting-associated protein 4B	49264	7.07	0	0	0	444	21	43	7	29	35	4	30	25	38	25	23	42	8	15	5	9	0	0	0	2	5	6	6	4	0	0	0	0	0	0	0	0	0
FG-SiO2-um	3491.92	-19.1167	0.0105373	Vacuolar protein sorting-associated protein 4B	49264	7.07	0	0	0	444	21	43	7	29	35	4	30	25	38	25	23	42	8	15	5	9	0	0	0	2	5	6	6	4	0	0	0	0	0	0	0	0	0
FG-TiO2-nm	616.497	-35.485	0.015372	Vacuolar protein sorting-associated protein 4B	49264	7.07	0	0	0	444	21	43	7	29	35	4	30	25	38	25	23	42	8	15	5	9	0	0	0	2	5	6	6	4	0	0	0	0	0	0	0.11	27	12
E171	252.627	-56.6533	0.0146964	Vacuolar protein sorting-associated protein 4B	49264	7.07	0	0	0	444	21	43	7	29	35	4	30	25	38	25	23	42	8	15	5	9	0	0	0	2	5	6	6	4	0	0	0	0	0	0	0.08	20	8
Milk	0	0	0	Tryptophan--tRNA ligase, cytoplasmic	53812	5.49	0	0	0	476	23	34	11	43	26	7	30	24	34	25	30	34	13	32	3	16	0	0	0	3	2	5	10	2	0	0	0	0	0	0	0	0	0
FG-SiO2-nm	583.778	-26.2522	0.0190663	Tryptophan--tRNA ligase, cytoplasmic	53812	5.49	0	0	0	476	23	34	11	43	26	7	30	24	34	25	30	34	13	32	3	16	0	0	0	3	2	5	10	2	0	0	0	0	0	0	0.033	10	3
FG-SiO2-um	3491.92	-19.1167	0.0105373	Tryptophan--tRNA ligase, cytoplasmic	53812	5.49	0	0	0	476	23	34	11	43	26	7	30	24	34	25	30	34	13	32	3	16	0	0	0	3	2	5	10	2	0	0	0	0	0	0	0	0	0
FG-TiO2-nm	616.497	-35.485	0.015372	Tryptophan--tRNA ligase, cytoplasmic	53812	5.49	0	0	0	476	23	34	11	43	26	7	30	24	34	25	30	34	13	32	3	16	0	0	0	3	2	5	10	2	0	0	0	0	0	0	0.099	25	11
E171	252.627	-56.6533	0.0146964	Tryptophan--tRNA ligase, cytoplasmic	53812	5.49	0	0	0	476	23	34	11	43	26	7	30	24	34	25	30	34	13	32	3	16	0	0	0	3	2	5	10	2	0	0	0	0	0	0	0.09	22	9
Milk	0	0	0	Unconventional myosin-Ic	121936	9.33	0	0	0	1063	91	66	24	46	81	16	58	45	71	72	55	118	10	47	13	35	1	0	0	8	11	9	13	6	0	0	0	0	0	0	0	0	0
FG-SiO2-nm	583.778	-26.2522	0.0190663	Unconventional myosin-Ic	121936	9.33	0	0	0	1063	91	66	24	46	81	16	58	45	71	72	55	118	10	47	13	35	1	0	0	8	11	9	13	6	0	0	0	0	0	0	0	0	0
FG-SiO2-um	3491.92	-19.1167	0.0105373	Unconventional myosin-Ic	121936	9.33	0	0	0	1063	91	66	24	46	81	16	58	45	71	72	55	118	10	47	13	35	1	0	0	8	11	9	13	6	0	0	0	0	0	0	0	0	0
FG-TiO2-nm	616.497	-35.485	0.015372	Unconventional myosin-Ic	121936	9.33	0	0	0	1063	91	66	24	46	81	16	58	45	71	72	55	118	10	47	13	35	1	0	0	8	11	9	13	6	0	0	0	0	0	0	0.099	13	11
E171	252.627	-56.6533	0.0146964	Unconventional myosin-Ic	121936	9.33	0	0	0	1063	91	66	24	46	81	16	58	45	71	72	55	118	10	47	13	35	1	0	0	8	11	9	13	6	0	0	0	0	0	0	0.08	8.3	8
Milk	0	0	0	Cytosol aminopeptidase	56289	6.07	17	23	4	519	24	34	9	26	37	7	43	37	61	36	29	44	13	21	8	9	0	0	0	0	3	1	2	3	0	0	0	7	0	0	0	0	0
FG-SiO2-nm	583.778	-26.2522	0.0190663	Cytosol aminopeptidase	56289	6.07	17	23	4	519	24	34	9	26	37	7	43	37	61	36	29	44	13	21	8	9	0	0	0	0	3	1	2	3	0	0	0	7	0	0	0.043	9.1	4
FG-SiO2-um	3491.92	-19.1167	0.0105373	Cytosol aminopeptidase	56289	6.07	17	23	4	519	24	34	9	26	37	7	43	37	61	36	29	44	13	21	8	9	0	0	0	0	3	1	2	3	0	0	0	7	0	0	0.023	4	2
FG-TiO2-nm	616.497	-35.485	0.015372	Cytosol aminopeptidase	56289	6.07	17	23	4	519	24	34	9	26	37	7	43	37	61	36	29	44	13	21	8	9	0	0	0	0	3	1	2	3	0	0	0	7	0	0	0.09	23	10
E171	252.627	-56.6533	0.0146964	Cytosol aminopeptidase	56289	6.07	17	23	4	519	24	34	9	26	37	7	43	37	61	36	29	44	13	21	8	9	0	0	0	0	3	1	2	3	0	0	0	7	0	0	0.06	14	6
Milk	0	0	0	14-3-3 protein theta	27764	4.68	9	0	1	245	11	19	1	18	26	5	9	4	24	10	12	27	6	6	2	11	0	0	0	2	2	2	3	3	0	0	0	0	0	0	0	0	0
FG-SiO2-nm	583.778	-26.2522	0.0190663	14-3-3 protein theta	27764	4.68	9	0	1	245	11	19	1	18	26	5	9	4	24	10	12	27	6	6	2	11	0	0	0	2	2	2	3	3	0	0	0	0	0	0	0	0	0
FG-SiO2-um	3491.92	-19.1167	0.0105373	14-3-3 protein theta	27764	4.68	9	0	1	245	11	19	1	18	26	5	9	4	24	10	12	27	6	6	2	11	0	0	0	2	2	2	3	3	0	0	0	0	0	0	0	0	0
FG-TiO2-nm	616.497	-35.485	0.015372	14-3-3 protein theta	27764	4.68	9	0	1	245	11	19	1	18	26	5	9	4	24	10	12	27	6	6	2	11	0	0	0	2	2	2	3	3	0	0	0	0	0	0	0.036	34	10
E171	252.627	-56.6533	0.0146964	14-3-3 protein theta	27764	4.68	9	0	1	245	11	19	1	18	26	5	9	4	24	10	12	27	6	6	2	11	0	0	0	2	2	2	3	3	0	0	0	0	0	0	0.03	26	7
Milk	0	0	0	Rab GDP dissociation inhibitor alpha	50566	5	22	26	3	447	21	29	5	33	32	10	31	21	23	32	30	36	14	19	1	25	0	0	0	7	1	1	2	0	0	0	0	0	0	0	0	0	0
FG-SiO2-nm	583.778	-26.2522	0.0190663	Rab GDP dissociation inhibitor alpha	50566	5	22	26	3	447	21	29	5	33	32	10	31	21	23	32	30	36	14	19	1	25	0	0	0	7	1	1	2	0	0	0	0	0	0	0	0	0	0
FG-SiO2-um	3491.92	-19.1167	0.0105373	Rab GDP dissociation inhibitor alpha	50566	5	22	26	3	447	21	29	5	33	32	10	31	21	23	32	30	36	14	19	1	25	0	0	0	7	1	1	2	0	0	0	0	0	0	0	0	0	0
FG-TiO2-nm	616.497	-35.485	0.015372	Rab GDP dissociation inhibitor alpha	50566	5	22	26	3	447	21	29	5	33	32	10	31	21	23	32	30	36	14	19	1	25	0	0	0	7	1	1	2	0	0	0	0	0	0	0	0.027	22	9
E171	252.627	-56.6533	0.0146964	Rab GDP dissociation inhibitor alpha	50566	5	22	26	3	447	21	29	5	33	32	10	31	21	23	32	30	36	14	19	1	25	0	0	0	7	1	1	2	0	0	0	0	0	0	0	0.02	16	6
Milk	0	0	0	Radixin	68568	5.95	0	0	0	583	36	66	12	27	84	2	16	25	49	26	26	51	15	19	7	14	0	0	0	4	3	1	16	2	0	0	0	0	0	0	0	0	0
FG-SiO2-nm	583.778	-26.2522	0.0190663	Radixin	68568	5.95	0	0	0	583	36	66	12	27	84	2	16	25	49	26	26	51	15	19	7	14	0	0	0	4	3	1	16	2	0	0	0	0	0	0	0	0	0
FG-SiO2-um	3491.92	-19.1167	0.0105373	Radixin	68568	5.95	0	0	0	583	36	66	12	27	84	2	16	25	49	26	26	51	15	19	7	14	0	0	0	4	3	1	16	2	0	0	0	0	0	0	0	0	0
FG-TiO2-nm	616.497	-35.485	0.015372	Radixin	68568	5.95	0	0	0	583	36	66	12	27	84	2	16	25	49	26	26	51	15	19	7	14	0	0	0	4	3	1	16	2	0	0	0	0	0	0	0	0	0
E171	252.627	-56.6533	0.0146964	Radixin	68568	5.95	0	0	0	583	36	66	12	27	84	2	16	25	49	26	26	51	15	19	7	14	0	0	0	4	3	1	16	2	0	0	0	0	0	0	0.02	11	12
Milk	0	0	0	Ethylmalonyl-CoA decarboxylase	33542	7.62	0	0	0	306	13	25	4	9	28	5	29	10	21	17	18	39	12	10	4	1	0	0	0	0	2	3	3	3	0	0	0	0	0	0	0	0	0
FG-SiO2-nm	583.778	-26.2522	0.0190663	Ethylmalonyl-CoA decarboxylase	33542	7.62	0	0	0	306	13	25	4	9	28	5	29	10	21	17	18	39	12	10	4	1	0	0	0	0	2	3	3	3	0	0	0	0	0	0	0	0	0
FG-SiO2-um	3491.92	-19.1167	0.0105373	Ethylmalonyl-CoA decarboxylase	33542	7.62	0	0	0	306	13	25	4	9	28	5	29	10	21	17	18	39	12	10	4	1	0	0	0	0	2	3	3	3	0	0	0	0	0	0	0	0	0
FG-TiO2-nm	616.497	-35.485	0.015372	Ethylmalonyl-CoA decarboxylase	33542	7.62	0	0	0	306	13	25	4	9	28	5	29	10	21	17	18	39	12	10	4	1	0	0	0	0	2	3	3	3	0	0	0	0	0	0	0.072	26	8
E171	252.627	-56.6533	0.0146964	Ethylmalonyl-CoA decarboxylase	33542	7.62	0	0	0	306	13	25	4	9	28	5	29	10	21	17	18	39	12	10	4	1	0	0	0	0	2	3	3	3	0	0	0	0	0	0	0.08	26	8
Milk	0	0	0	Glycerol-3-phosphate dehydrogenase [NAD(+)], cytoplasmic	37648	6.42	0	0	0	349	9	25	11	14	23	10	36	13	29	33	26	29	9	15	2	4	0	0	0	0	2	0	0	0	0	0	0	0	0	0	0	0	0
FG-SiO2-nm	583.778	-26.2522	0.0190663	Glycerol-3-phosphate dehydrogenase [NAD(+)], cytoplasmic	37648	6.42	0	0	0	349	9	25	11	14	23	10	36	13	29	33	26	29	9	15	2	4	0	0	0	0	2	0	0	0	0	0	0	0	0	0	0.022	9.2	2
FG-SiO2-um	3491.92	-19.1167	0.0105373	Glycerol-3-phosphate dehydrogenase [NAD(+)], cytoplasmic	37648	6.42	0	0	0	349	9	25	11	14	23	10	36	13	29	33	26	29	9	15	2	4	0	0	0	0	2	0	0	0	0	0	0	0	0	0	0.046	14	4
FG-TiO2-nm	616.497	-35.485	0.015372	Glycerol-3-phosphate dehydrogenase [NAD(+)], cytoplasmic	37648	6.42	0	0	0	349	9	25	11	14	23	10	36	13	29	33	26	29	9	15	2	4	0	0	0	0	2	0	0	0	0	0	0	0	0	0	0.072	25	8
E171	252.627	-56.6533	0.0146964	Glycerol-3-phosphate dehydrogenase [NAD(+)], cytoplasmic	37648	6.42	0	0	0	349	9	25	11	14	23	10	36	13	29	33	26	29	9	15	2	4	0	0	0	0	2	0	0	0	0	0	0	0	0	0	0.07	17	7
Milk	0	0	0	Heat shock protein beta-1	22393	5.98	0	0	0	201	15	7	5	8	17	1	14	19	17	12	6	17	1	7	6	5	0	0	0	2	1	5	5	0	0	0	0	0	0	0	0	0	0
FG-SiO2-nm	583.778	-26.2522	0.0190663	Heat shock protein beta-1	22393	5.98	0	0	0	201	15	7	5	8	17	1	14	19	17	12	6	17	1	7	6	5	0	0	0	2	1	5	5	0	0	0	0	0	0	0	0.043	21	4
FG-SiO2-um	3491.92	-19.1167	0.0105373	Heat shock protein beta-1	22393	5.98	0	0	0	201	15	7	5	8	17	1	14	19	17	12	6	17	1	7	6	5	0	0	0	2	1	5	5	0	0	0	0	0	0	0	0	0	0
FG-TiO2-nm	616.497	-35.485	0.015372	Heat shock protein beta-1	22393	5.98	0	0	0	201	15	7	5	8	17	1	14	19	17	12	6	17	1	7	6	5	0	0	0	2	1	5	5	0	0	0	0	0	0	0	0.045	32	5
E171	252.627	-56.6533	0.0146964	Heat shock protein beta-1	22393	5.98	0	0	0	201	15	7	5	8	17	1	14	19	17	12	6	17	1	7	6	5	0	0	0	2	1	5	5	0	0	0	0	0	0	0	0.07	40	7
